# Supplementary material
Source: Research Square preprint supplement (doi:10.21203/rs.3.rs-8921439/v1)

# Supplementary Materials

**Supplementary Tables**

**Supplementary Table 1: Clinical definitions of the nine macular disease classes used in this study.**

**Supplementary Table 2: List of large language models (LLM) tested in this study, categorised by LLM family and model parameters.**

**Supplementary Table 3: Distribution of ground truth labels for the development dataset of 600 letters.**

**Supplementary Table 4: Comprehensive performance metrics (accuracy, recall, specificity, precision, positive predictive value [PPV], negative predictive value [NPV]) with 95% confidence intervals for all 9 classes, for Gemini 1.5 flash only.**

**Supplementary Table 5: Micro-averaged performance metrics with 95% confidence intervals for all models across prompts 1-7.**

**Supplementary Figures**

**Supplementary Figure 1: Figure depicting the structure of Prompt 5a and 5b, which contain all modules described (task definitions, JSON schema and instructions, conditions and description thereof, core principles, and the clinical letter to analyse).** Note that the position of the clinical letter in the prompt is presented at the end of the prompt in 5a, and towards the beginning (after the initial instructions) in 5b.

**Supplementary Figure 2: Figure depicting a sample clinical letter and the corresponding JSON output.** Note that this is a synthetic letter written by a clinician for illustration purposes only.

**Supplementary Figure 3: Line plots demonstrating the F1 scores by prompt for each Gemini model, with each subplot representing one of nine conditions.**

**Supplementary Figure 4: Line plots demonstrating the F1 scores by prompt for each model, with each subplot representing one of nine conditions, in addition to the micro- and macro-average F1 scores overall.**

**Supplementary Figure 5: Pareto frontier analysis of LLM configurations across multiple LLM families and model sizes for the performance-cost trade-off (cost frontier), with each sub-figure representing one prompt from 1-7.** The Pareto frontiers for all models (black line) and for local models only (red dotted line) are presented.

**Supplementary Figure 6: Pareto frontier analysis of LLM configurations across multiple LLM families and model sizes for the performance-time trade-off (latency frontier), with each sub-figure representing one prompt from 1-7**.The Pareto frontiers for all models (black line) and for local models only (red dotted line) are presented.

**Supplementary Figure 7: Bubble chart depicting the cost and time trade-offs across multiple LLM families and model size, with performance represented by the bubble size. Each sub-figure represents one prompt from 1-7.** The axes are plotted on a log-log scale to better show the orders of magnitude difference in resource consumption. Highly efficient models are positioned in the lower left corner of the chart (low cost and low time) and are represented by the largest bubbles (high F1 score).

**Supplementary Figure 8: Confusion matrix comparing the error taxonomy theme assignments between the LLM judge’s prediction and the human grader's ground truth.** The numbers indicate the count of observations in each category.

**Supplementary Figure 9: Distribution of error themes by model and prompt.** The stacked bars are coloured according to the specific error category, allowing for a side-by-side comparison of the frequency of each error type across different model and prompt combinations.

**Supplementary Figure 10: Normalised distribution of error themes by model and prompt, displaying the proportion of error categories for each prompt.** The stacked bars are coloured according to the specific error category, allowing for a side-by-side comparison of the relative frequency of each error type across different model and prompt combinations.

## Supplementary Tables

**Supplementary Table 1: Clinical definitions of the nine macular disease classes used in this study.**

*CNV, choroidal neovascularisation; AMD, age-related macular degeneration; CMO, cystoid macular oedema; CSCR, central serous chorioretinopathy, ERM, epiretinal membrane; VMT, vitreomacular traction*

| **Condition** | **Definitions** |
| --- | --- |
| Choroidal neovascularisation (CNV) | The growth of abnormal blood vessels from the choroid into the retina, often associated with leakage of fluid or blood.  Subtypes: classic CNV, occult CNV, retinal angiomatous proliferation, idiopathic polypoidal choroidal vasculopathy  Aetiology: neovascular age-related macular degeneration (AMD), pathologic myopia, inflammatory disorders, etc. |
| Macular oedema | Macular swelling or thickening due to leakage-driven fluid accumulation in the macula. This includes cystoid macular oedema (CMO), diabetic macular oedema, postoperative CMO, fluid associated with macroaneurysms etc.  Subretinal or intraretinal fluid associated with CNV and CSCR is not considered macular oedema.  Intraretinal cysts associated with ERM, VMT, macular hole, schisis or other non-oedema causes are also not considered to be macular oedema - unless macular oedema is explicitly mentioned as a separate diagnosis. |
| Central serous chorioretinopathy (CSCR) | A condition characterised by fluid build-up under the retina (subretinal fluid) resulting in neurosensory retinal detachment. Part of the pachychoroid disease spectrum (thickening of the choroid).  Synonym: Central serous retinopathy (CSR) |
| Drusen | Small yellow deposits of extracellular material that accumulate under the retinal pigment epithelium (RPE). For the purposes of this study, only classic drusen located in the macula are included.  Excludes: extramacular drusen (e.g. in the mid-peripheral or peripheral retina), drusen associated with choroidal naevi (unless this is in the macula) |
| Geographic atrophy | The advanced atrophic form of AMD, characterised by the presence of well-demarcated areas of atrophy in the macula, which often start in the outer retina.  Excludes: Non-specific atrophy that is not associated with AMD, such as chorioretinal atrophy, outer retinal atrophy, or macular atrophy not driven by AMD. |
| Partial thickness macular hole | A partial thickness defect of the neurosensory retina affecting the inner retinal layers.  Synonym: Lamellar hole (LMH), macular pseudohole. |
| Full thickness macular hole | A full-thickness defect of the neurosensory retina at the fovea (central part of the macula). |
| Epiretinal membrane (ERM) | A thin layer of fibrocellular tissue that forms on the inner surface of the retina. |
| Vitreomacular traction (VMT) | A condition where the vitreous pulls on the macula, causing traction.  Excludes: the precursor stage of vitreomacular adhesion |

**Supplementary Table 2: List of large language models (LLM) tested in this study, categorised by LLM family and model parameters. For local LLMs, the quantisation details are presented in bit-precision in brackets.** *MoE, mixture of experts*

| **LLM Family** | **Small model (<10b)** | **Medium model** | **Large model** |
| --- | --- | --- | --- |
| Gemini |  |  | gemini-1.5-flash  gemini-1.5-pro  gemini-2.5-flash |
| Gemma | gemma2-2b (Q4_0)  gemma2-9b (Q4_0) | gemma2-27b (Q4_0) |  |
| MedGemma |  | medgemma-27b (Q4_K_M) |  |
| Llama | llama3.1-8b (Q4_K_M) |  | llama3.3-70b (Q4_K_M) |
| Mistral |  | mistral-small-22b (Q4_0)  mistral-small3.2:24b (Q4_K_M) | mixtral-8*7b (MoE) (Q4_0) |
| GPT-oss |  | gpt-oss-20b (MXFP4) |  |
| Deepseek |  | deepseek-r1-14b (Q4_K_M)  deepseek-r1-32b (Q4_K_M) |  |
| Phi |  | phi3-14b (Q4_0)  phi4-14b (Q4_K_M) |  |
| Cogito | cogito-3b (Q4_K_M)  cogito-8b (Q4_K_M) | cogito-14b (Q4_K_M)  cogito-32b (Q4_K_M) |  |

**VM Instance 1 (small):**

CPU: Intel Xeon (8) @ 2.199GHz

Memory: 30,089MiB

GPU: NVIDIA Tesla T4

OS: Debian GNU/Linux 12 (bookworm) x86_64

**VM Instance 2 (large):**

CPU: Intel Xeon (32) @ 2.199GHz

Memory: 120,760MiB

GPU: NVIDIA Tesla T4 x 4

OS: Debian GNU/Linux 11 (bullseye) x86_64

**Supplementary Table 3: Distribution of ground truth labels for the development dataset of 600 letters.**

| **Condition** | **Positive** | **Suspected/ Uncertain** | **Negative** |
| --- | --- | --- | --- |
| Choroidal neovascularisation | 48 | 8 | 544 |
| Macular oedema | 78 | 2 | 520 |
| Central serous retinopathy | 40 | 10 | 550 |
| Drusen | 86 | 0 | 514 |
| Geographic atrophy | 42 | 0 | 558 |
| Partial thickness macular hole | 49 | 0 | 551 |
| Full thickness macular hole | 45 | 0 | 555 |
| Epiretinal membrane | 77 | 0 | 523 |
| Vitreomacular traction | 43 | 0 | 557 |

Note: Because each letter could contain zero, one, or multiple classes simultaneously, this was treated as a multi-label classification problem, where each class is treated independently while allowing for multiple labels within the same clinical letter. As such, each condition (row) sums up to 600, but because a single letter can be positive for multiple conditions simultaneously, the sum of all positive classifications will exceed the total number of letters.

**Supplementary Table 4: Comprehensive performance metrics (accuracy, recall, specificity, precision, positive predictive value [PPV], negative predictive value [NPV]) with 95% confidence intervals for all 9 classes, for Gemini 1.5 flash only.**

| **Diagnosis** | **Prompt** | **Accuracy** | **Sensitivity (Recall)** | **Specificity** | **PPV (Precision)** | **NPV** | **F1 score** |
| --- | --- | --- | --- | --- | --- | --- | --- |
| **CNV** | Prompt 1 | 0.976 (0.960–0.986) | 0.778 (0.637–0.875) | 0.993 (0.981–0.997) | 0.897 (0.764–0.959) | 0.982 (0.967–0.990) | 0.833 (0.737–0.911) |
| **CNV** | Prompt 2 | 0.978 (0.963–0.987) | 0.804 (0.668–0.893) | 0.993 (0.981–0.997) | 0.902 (0.775–0.961) | 0.984 (0.969–0.991) | 0.851 (0.761–0.926) |
| **CNV** | Prompt 3 | 0.978 (0.962–0.987) | 0.762 (0.615–0.865) | 0.994 (0.984–0.998) | 0.914 (0.776–0.970) | 0.982 (0.967–0.990) | 0.831 (0.730–0.911) |
| **CNV** | Prompt 4 | 0.985 (0.971–0.992) | 0.867 (0.738–0.937) | 0.994 (0.984–0.998) | 0.929 (0.810–0.975) | 0.989 (0.976–0.995) | 0.897 (0.819–0.957) |
| **CNV** | Prompt 5a | 0.995 (0.985–0.998) | 0.978 (0.887–0.996) | 0.996 (0.987–0.999) | 0.957 (0.858–0.988) | 0.998 (0.990–1.000) | 0.968 (0.925–1.000) |
| **CNV** | Prompt 5b | 0.997 (0.988–0.999) | 0.978 (0.887–0.996) | 0.998 (0.990–1.000) | 0.978 (0.887–0.996) | 0.998 (0.990–1.000) | 0.978 (0.943–1.000) |
| **CNV** | Prompt 6 | 0.995 (0.985–0.998) | 0.978 (0.887–0.996) | 0.996 (0.987–0.999) | 0.957 (0.858–0.988) | 0.998 (0.990–1.000) | 0.968 (0.923–1.000) |
| **CNV** | Prompt 7 | 0.990 (0.978–0.995) | 0.935 (0.825–0.978) | 0.994 (0.984–0.998) | 0.935 (0.825–0.978) | 0.994 (0.984–0.998) | 0.935 (0.875–0.979) |
| **CSR** | Prompt 1 | 0.978 (0.962–0.987) | 1.000 (0.912–1.000) | 0.976 (0.959–0.986) | 0.755 (0.624–0.851) | 1.000 (0.993–1.000) | 0.860 (0.775–0.927) |
| **CSR** | Prompt 2 | 0.979 (0.964–0.988) | 1.000 (0.912–1.000) | 0.978 (0.961–0.987) | 0.769 (0.639–0.863) | 1.000 (0.993–1.000) | 0.870 (0.787–0.936) |
| **CSR** | Prompt 3 | 0.976 (0.960–0.986) | 1.000 (0.912–1.000) | 0.974 (0.957–0.985) | 0.741 (0.611–0.839) | 1.000 (0.993–1.000) | 0.851 (0.767–0.921) |
| **CSR** | Prompt 4 | 0.976 (0.960–0.986) | 1.000 (0.912–1.000) | 0.974 (0.957–0.984) | 0.741 (0.611–0.839) | 1.000 (0.993–1.000) | 0.851 (0.767–0.921) |
| **CSR** | Prompt 5a | 0.991 (0.980–0.996) | 0.900 (0.769–0.960) | 0.998 (0.990–1.000) | 0.973 (0.862–0.995) | 0.993 (0.981–0.997) | 0.935 (0.868–0.986) |
| **CSR** | Prompt 5b | 0.995 (0.985–0.998) | 1.000 (0.912–1.000) | 0.994 (0.984–0.998) | 0.930 (0.814–0.976) | 1.000 (0.993–1.000) | 0.964 (0.916–1.000) |
| **CSR** | Prompt 6 | 0.993 (0.983–0.997) | 0.950 (0.835–0.986) | 0.996 (0.987–0.999) | 0.950 (0.835–0.986) | 0.996 (0.987–0.999) | 0.950 (0.892–0.989) |
| **CSR** | Prompt 7 | 0.991 (0.980–0.996) | 0.950 (0.835–0.986) | 0.994 (0.984–0.998) | 0.927 (0.806–0.975) | 0.996 (0.987–0.999) | 0.938 (0.875–0.987) |
| **Drusen** | Prompt 1 | 0.948 (0.927–0.964) | 0.701 (0.592–0.792) | 0.986 (0.972–0.993) | 0.885 (0.782–0.943) | 0.956 (0.935–0.970) | 0.783 (0.702–0.855) |
| **Drusen** | Prompt 2 | 0.960 (0.940–0.973) | 0.758 (0.642–0.845) | 0.986 (0.972–0.993) | 0.877 (0.768–0.939) | 0.969 (0.950–0.981) | 0.813 (0.731–0.881) |
| **Drusen** | Prompt 3 | 0.949 (0.928–0.965) | 0.687 (0.568–0.785) | 0.984 (0.969–0.992) | 0.852 (0.734–0.923) | 0.960 (0.939–0.973) | 0.760 (0.667–0.841) |
| **Drusen** | Prompt 4 | 0.973 (0.957–0.984) | 0.889 (0.788–0.945) | 0.984 (0.969–0.992) | 0.875 (0.772–0.935) | 0.986 (0.971–0.993) | 0.882 (0.816–0.935) |
| **Drusen** | Prompt 5a | 0.978 (0.962–0.987) | 0.897 (0.810–0.947) | 0.990 (0.977–0.996) | 0.933 (0.853–0.971) | 0.984 (0.969–0.992) | 0.915 (0.864–0.959) |
| **Drusen** | Prompt 5b | 0.985 (0.971–0.992) | 0.949 (0.875–0.980) | 0.990 (0.977–0.996) | 0.937 (0.860–0.973) | 0.992 (0.980–0.997) | 0.943 (0.900–0.976) |
| **Drusen** | Prompt 6 | 0.980 (0.965–0.988) | 0.916 (0.836–0.959) | 0.990 (0.977–0.996) | 0.938 (0.864–0.973) | 0.986 (0.972–0.993) | 0.927 (0.880–0.964) |
| **Drusen** | Prompt 7 | 0.976 (0.960–0.986) | 0.911 (0.828–0.956) | 0.986 (0.971–0.993) | 0.911 (0.828–0.956) | 0.986 (0.971–0.993) | 0.911 (0.860–0.955) |
| **ERM** | Prompt 1 | 0.997 (0.988–0.999) | 1.000 (0.952–1.000) | 0.996 (0.986–0.999) | 0.974 (0.911–0.993) | 1.000 (0.993–1.000) | 0.987 (0.966–1.000) |
| **ERM** | Prompt 2 | 0.995 (0.985–0.998) | 1.000 (0.950–1.000) | 0.994 (0.983–0.998) | 0.961 (0.890–0.986) | 1.000 (0.993–1.000) | 0.980 (0.954–1.000) |
| **ERM** | Prompt 3 | 0.995 (0.985–0.998) | 1.000 (0.950–1.000) | 0.994 (0.983–0.998) | 0.961 (0.890–0.986) | 1.000 (0.993–1.000) | 0.980 (0.953–1.000) |
| **ERM** | Prompt 4 | 0.995 (0.985–0.998) | 1.000 (0.949–1.000) | 0.994 (0.983–0.998) | 0.960 (0.889–0.986) | 1.000 (0.993–1.000) | 0.980 (0.952–1.000) |
| **ERM** | Prompt 5a | 0.997 (0.988–0.999) | 1.000 (0.951–1.000) | 0.996 (0.986–0.999) | 0.974 (0.910–0.993) | 1.000 (0.993–1.000) | 0.987 (0.966–1.000) |
| **ERM** | Prompt 5b | 0.995 (0.985–0.998) | 1.000 (0.951–1.000) | 0.994 (0.983–0.998) | 0.962 (0.893–0.987) | 1.000 (0.993–1.000) | 0.980 (0.954–1.000) |
| **ERM** | Prompt 6 | 0.995 (0.985–0.998) | 1.000 (0.951–1.000) | 0.994 (0.983–0.998) | 0.962 (0.893–0.987) | 1.000 (0.993–1.000) | 0.980 (0.955–1.000) |
| **ERM** | Prompt 7 | 0.997 (0.988–0.999) | 1.000 (0.951–1.000) | 0.996 (0.986–0.999) | 0.974 (0.910–0.993) | 1.000 (0.993–1.000) | 0.987 (0.965–1.000) |
| **FTMH** | Prompt 1 | 0.981 (0.967–0.990) | 1.000 (0.918–1.000) | 0.980 (0.964–0.989) | 0.796 (0.671–0.882) | 1.000 (0.993–1.000) | 0.887 (0.812–0.947) |
| **FTMH** | Prompt 2 | 0.983 (0.969–0.991) | 1.000 (0.918–1.000) | 0.982 (0.967–0.990) | 0.811 (0.686–0.894) | 1.000 (0.993–1.000) | 0.896 (0.824–0.955) |
| **FTMH** | Prompt 3 | 0.987 (0.974–0.993) | 1.000 (0.920–1.000) | 0.985 (0.972–0.993) | 0.846 (0.725–0.920) | 1.000 (0.993–1.000) | 0.917 (0.850–0.968) |
| **FTMH** | Prompt 4 | 0.981 (0.967–0.990) | 1.000 (0.918–1.000) | 0.980 (0.965–0.989) | 0.796 (0.671–0.882) | 1.000 (0.993–1.000) | 0.887 (0.809–0.945) |
| **FTMH** | Prompt 5a | 0.997 (0.988–0.999) | 0.977 (0.882–0.996) | 0.998 (0.990–1.000) | 0.977 (0.882–0.996) | 0.998 (0.990–1.000) | 0.977 (0.940–1.000) |
| **FTMH** | Prompt 5b | 0.997 (0.988–0.999) | 1.000 (0.920–1.000) | 0.996 (0.987–0.999) | 0.957 (0.855–0.988) | 1.000 (0.993–1.000) | 0.978 (0.941–1.000) |
| **FTMH** | Prompt 6 | 0.993 (0.983–0.997) | 1.000 (0.920–1.000) | 0.993 (0.982–0.997) | 0.917 (0.804–0.967) | 1.000 (0.993–1.000) | 0.957 (0.907–0.991) |
| **FTMH** | Prompt 7 | 0.987 (0.974–0.993) | 1.000 (0.920–1.000) | 0.986 (0.972–0.993) | 0.846 (0.725–0.920) | 1.000 (0.993–1.000) | 0.917 (0.851–0.968) |
| **GA** | Prompt 1 | 0.949 (0.928–0.964) | 1.000 (0.916–1.000) | 0.945 (0.922–0.961) | 0.583 (0.468–0.690) | 1.000 (0.993–1.000) | 0.737 (0.639–0.820) |
| **GA** | Prompt 2 | 0.965 (0.947–0.978) | 1.000 (0.916–1.000) | 0.963 (0.943–0.976) | 0.677 (0.554–0.780) | 1.000 (0.993–1.000) | 0.808 (0.716–0.883) |
| **GA** | Prompt 3 | 0.966 (0.948–0.978) | 1.000 (0.916–1.000) | 0.963 (0.944–0.976) | 0.677 (0.554–0.780) | 1.000 (0.993–1.000) | 0.808 (0.717–0.887) |
| **GA** | Prompt 4 | 0.965 (0.946–0.977) | 1.000 (0.916–1.000) | 0.962 (0.942–0.975) | 0.677 (0.554–0.780) | 1.000 (0.992–1.000) | 0.808 (0.716–0.882) |
| **GA** | Prompt 5a | 0.976 (0.961–0.986) | 1.000 (0.916–1.000) | 0.975 (0.958–0.985) | 0.750 (0.623–0.845) | 1.000 (0.993–1.000) | 0.857 (0.779–0.923) |
| **GA** | Prompt 5b | 0.993 (0.983–0.997) | 1.000 (0.916–1.000) | 0.993 (0.982–0.997) | 0.913 (0.797–0.966) | 1.000 (0.993–1.000) | 0.955 (0.905–0.990) |
| **GA** | Prompt 6 | 0.993 (0.983–0.997) | 1.000 (0.916–1.000) | 0.993 (0.982–0.997) | 0.913 (0.797–0.966) | 1.000 (0.993–1.000) | 0.955 (0.905–0.990) |
| **GA** | Prompt 7 | 0.982 (0.967–0.990) | 1.000 (0.916–1.000) | 0.980 (0.965–0.989) | 0.792 (0.665–0.880) | 1.000 (0.993–1.000) | 0.884 (0.810–0.946) |
| **Macular Oedema** | Prompt 1 | 0.933 (0.908–0.951) | 1.000 (0.950–1.000) | 0.922 (0.894–0.943) | 0.670 (0.577–0.751) | 1.000 (0.991–1.000) | 0.802 (0.733–0.861) |
| **Macular Oedema** | Prompt 2 | 0.943 (0.919–0.960) | 0.986 (0.926–0.998) | 0.936 (0.909–0.955) | 0.713 (0.618–0.792) | 0.998 (0.987–1.000) | 0.828 (0.761–0.884) |
| **Macular Oedema** | Prompt 3 | 0.954 (0.933–0.969) | 0.986 (0.922–0.997) | 0.949 (0.925–0.966) | 0.747 (0.649–0.825) | 0.998 (0.987–1.000) | 0.850 (0.784–0.904) |
| **Macular Oedema** | Prompt 4 | 0.958 (0.938–0.972) | 1.000 (0.950–1.000) | 0.952 (0.929–0.968) | 0.760 (0.666–0.835) | 1.000 (0.992–1.000) | 0.864 (0.806–0.915) |
| **Macular Oedema** | Prompt 5a | 0.938 (0.916–0.955) | 0.973 (0.907–0.993) | 0.933 (0.908–0.952) | 0.679 (0.585–0.760) | 0.996 (0.985–0.999) | 0.800 (0.733–0.859) |
| **Macular Oedema** | Prompt 5b | 0.966 (0.947–0.978) | 1.000 (0.951–1.000) | 0.960 (0.940–0.974) | 0.789 (0.697–0.859) | 1.000 (0.992–1.000) | 0.882 (0.826–0.931) |
| **Macular Oedema** | Prompt 6 | 0.969 (0.952–0.981) | 1.000 (0.951–1.000) | 0.965 (0.945–0.978) | 0.806 (0.715–0.874) | 1.000 (0.992–1.000) | 0.893 (0.839–0.938) |
| **Macular Oedema** | Prompt 7 | 0.947 (0.926–0.962) | 0.974 (0.909–0.993) | 0.943 (0.919–0.960) | 0.718 (0.625–0.796) | 0.996 (0.985–0.999) | 0.827 (0.762–0.883) |
| **PTMH** | Prompt 1 | 0.980 (0.965–0.988) | 0.870 (0.743–0.939) | 0.989 (0.976–0.995) | 0.870 (0.743–0.939) | 0.989 (0.976–0.995) | 0.870 (0.788–0.938) |
| **PTMH** | Prompt 2 | 0.983 (0.969–0.991) | 0.886 (0.760–0.950) | 0.991 (0.979–0.996) | 0.886 (0.760–0.950) | 0.991 (0.979–0.996) | 0.886 (0.805–0.949) |
| **PTMH** | Prompt 3 | 0.986 (0.973–0.993) | 0.902 (0.775–0.961) | 0.993 (0.981–0.997) | 0.902 (0.775–0.961) | 0.993 (0.981–0.997) | 0.902 (0.828–0.962) |
| **PTMH** | Prompt 4 | 0.992 (0.981–0.996) | 1.000 (0.927–1.000) | 0.991 (0.979–0.996) | 0.907 (0.801–0.960) | 1.000 (0.993–1.000) | 0.951 (0.901–0.990) |
| **PTMH** | Prompt 5a | 0.993 (0.983–0.997) | 1.000 (0.927–1.000) | 0.993 (0.981–0.997) | 0.925 (0.821–0.970) | 1.000 (0.993–1.000) | 0.961 (0.917–0.991) |
| **PTMH** | Prompt 5b | 0.997 (0.988–0.999) | 1.000 (0.926–1.000) | 0.996 (0.987–0.999) | 0.960 (0.865–0.989) | 1.000 (0.993–1.000) | 0.980 (0.945–1.000) |
| **PTMH** | Prompt 6 | 0.997 (0.988–0.999) | 1.000 (0.927–1.000) | 0.996 (0.987–0.999) | 0.961 (0.868–0.989) | 1.000 (0.993–1.000) | 0.980 (0.946–1.000) |
| **PTMH** | Prompt 7 | 0.995 (0.985–0.998) | 1.000 (0.927–1.000) | 0.995 (0.984–0.998) | 0.942 (0.844–0.980) | 1.000 (0.993–1.000) | 0.970 (0.932–1.000) |
| **VMT** | Prompt 1 | 0.985 (0.971–0.992) | 1.000 (0.916–1.000) | 0.984 (0.969–0.991) | 0.824 (0.697–0.904) | 1.000 (0.993–1.000) | 0.903 (0.833–0.961) |
| **VMT** | Prompt 2 | 0.990 (0.978–0.995) | 1.000 (0.916–1.000) | 0.989 (0.976–0.995) | 0.875 (0.753–0.941) | 1.000 (0.993–1.000) | 0.933 (0.870–0.978) |
| **VMT** | Prompt 3 | 0.990 (0.978–0.995) | 1.000 (0.916–1.000) | 0.989 (0.976–0.995) | 0.875 (0.753–0.941) | 1.000 (0.993–1.000) | 0.933 (0.873–0.980) |
| **VMT** | Prompt 4 | 0.993 (0.983–0.997) | 1.000 (0.916–1.000) | 0.993 (0.981–0.997) | 0.913 (0.797–0.966) | 1.000 (0.993–1.000) | 0.955 (0.904–0.990) |
| **VMT** | Prompt 5a | 0.993 (0.983–0.997) | 1.000 (0.918–1.000) | 0.993 (0.982–0.997) | 0.915 (0.801–0.966) | 1.000 (0.993–1.000) | 0.956 (0.905–0.990) |
| **VMT** | Prompt 5b | 0.997 (0.988–0.999) | 1.000 (0.916–1.000) | 0.996 (0.987–0.999) | 0.955 (0.849–0.987) | 1.000 (0.993–1.000) | 0.977 (0.938–1.000) |
| **VMT** | Prompt 6 | 0.997 (0.988–0.999) | 1.000 (0.918–1.000) | 0.996 (0.987–0.999) | 0.956 (0.852–0.988) | 1.000 (0.993–1.000) | 0.977 (0.941–1.000) |
| **VMT** | Prompt 7 | 0.993 (0.983–0.997) | 1.000 (0.918–1.000) | 0.993 (0.982–0.997) | 0.915 (0.801–0.966) | 1.000 (0.993–1.000) | 0.956 (0.905–0.990) |

##

**Supplementary Table 5: Micro-averaged F1 scores for laterality with 95% confidence intervals for all models across prompts 1-7.**

| **Model** | **Prompt 1** | **Prompt 2** | **Prompt 3** | **Prompt 4** | **Prompt 5a** | **Prompt 5b** | **Prompt 6** | **Prompt 7** |
| --- | --- | --- | --- | --- | --- | --- | --- | --- |
| **cogito:8b** | 0.887 (0.849–0.923) | 0.886 (0.846–0.921) | 0.893 (0.857–0.929) | 0.920 (0.887–0.949) | 0.905 (0.870–0.933) | 0.916 (0.883–0.945) | 0.899 (0.863–0.929) | 0.880 (0.845–0.911) |
| **cogito:14b** | 0.946 (0.919–0.969) | 0.959 (0.936–0.980) | 0.953 (0.927–0.977) | 0.962 (0.939–0.981) | 0.944 (0.917–0.968) | 0.933 (0.906–0.959) | 0.938 (0.912–0.963) | 0.915 (0.884–0.943) |
| **cogito:32b** | 0.958 (0.936–0.977) | 0.973 (0.953–0.990) | 0.964 (0.941–0.984) | 0.965 (0.942–0.984) | 0.955 (0.931–0.976) | 0.948 (0.923–0.971) | 0.943 (0.917–0.966) | 0.955 (0.932–0.975) |
| **deepseek-r1:14b** | 0.933 (0.905–0.957) | 0.950 (0.925–0.972) | 0.968 (0.945–0.987) | 0.961 (0.940–0.979) | 0.976 (0.958–0.991) | 0.958 (0.937–0.979) | 0.973 (0.955–0.988) | 0.951 (0.928–0.974) |
| **deepseek-r1:32b** | 0.959 (0.935–0.979) | 0.970 (0.949–0.985) | 0.973 (0.955–0.988) | 0.979 (0.964–0.991) | 0.962 (0.941–0.980) | 0.963 (0.943–0.983) | 0.963 (0.943–0.983) | 0.966 (0.946–0.983) |
| **gemini-1.5-flash** | 0.969 (0.951–0.988) | 0.975 (0.956–0.991) | 0.968 (0.949–0.987) | 0.971 (0.953–0.988) | 0.960 (0.937–0.980) | 0.963 (0.943–0.983) | 0.966 (0.946–0.983) | 0.963 (0.944–0.980) |
| **gemini-1.5-pro** | 0.963 (0.944–0.983) | 0.977 (0.960–0.991) | 0.976 (0.959–0.991) | 0.971 (0.954–0.989) | 0.962 (0.942–0.980) | 0.951 (0.929–0.973) | 0.958 (0.936–0.978) | 0.956 (0.934–0.975) |
| **gemini-2.5-flash** | 0.983 (0.968–0.994) | 0.988 (0.977–0.997) | 0.988 (0.976–0.997) | 0.979 (0.962–0.994) | 0.983 (0.968–0.994) | 0.983 (0.969–0.994) | 0.983 (0.968–0.994) | 0.983 (0.969–0.994) |
| **gemini-2.5-flash-updated** | 0.983 (0.968–0.994) | 0.985 (0.971–0.997) | 0.982 (0.967–0.994) | 0.985 (0.971–0.997) | 0.988 (0.977–0.997) | 0.986 (0.972–0.997) | 0.986 (0.971–0.997) | 0.989 (0.977–0.997) |
| **gemma2:27b** | 0.954 (0.928–0.977) | 0.969 (0.949–0.986) | 0.959 (0.936–0.980) | 0.963 (0.942–0.982) | 0.949 (0.923–0.972) | 0.924 (0.895–0.949) | 0.912 (0.880–0.940) | 0.940 (0.915–0.963) |
| **gemma2:2b** | 0.811 (0.757–0.864) | 0.819 (0.776–0.859) | 0.820 (0.778–0.863) | 0.829 (0.781–0.870) | 0.779 (0.724–0.834) | 0.797 (0.747–0.848) | 0.768 (0.705–0.826) | 0.842 (0.792–0.887) |
| **gemma2:9b** | 0.945 (0.916–0.971) | 0.951 (0.923–0.976) | 0.955 (0.931–0.976) | 0.949 (0.925–0.970) | 0.949 (0.926–0.970) | 0.965 (0.943–0.984) | 0.964 (0.943–0.982) | 0.960 (0.939–0.982) |
| **gpt-oss:20b** | 0.979 (0.962–0.994) | 0.982 (0.967–0.994) | 0.985 (0.970–0.997) | 0.979 (0.961–0.994) | 0.961 (0.940–0.979) | 0.971 (0.950–0.988) | 0.960 (0.938–0.978) | 0.968 (0.948–0.986) |
| **llama3.1:8b** | 0.879 (0.842–0.913) | 0.929 (0.898–0.961) | 0.925 (0.895–0.952) | 0.934 (0.903–0.962) | 0.914 (0.882–0.944) | 0.911 (0.875–0.943) | 0.909 (0.877–0.938) | 0.890 (0.855–0.922) |
| **llama3.3:70b** | 0.979 (0.961–0.994) | 0.979 (0.963–0.994) | 0.979 (0.960–0.994) | 0.982 (0.968–0.994) | 0.980 (0.966–0.994) | 0.950 (0.927–0.972) | 0.947 (0.922–0.969) | 0.946 (0.921–0.967) |
| **medgemma:27b** | 0.956 (0.931–0.978) | 0.968 (0.949–0.987) | 0.974 (0.954–0.990) | 0.973 (0.955–0.991) | 0.961 (0.937–0.979) | 0.964 (0.941–0.984) | 0.941 (0.911–0.967) | 0.958 (0.937–0.979) |
| **mistral-small3.2:24b** | 0.973 (0.955–0.988) | 0.975 (0.956–0.991) | 0.969 (0.951–0.988) | 0.976 (0.958–0.991) | 0.977 (0.960–0.991) | 0.980 (0.962–0.994) | 0.979 (0.962–0.991) | 0.979 (0.962–0.994) |
| **mistral-small:22b** | 0.967 (0.944–0.987) | 0.970 (0.950–0.987) | 0.980 (0.963–0.993) | 0.969 (0.948–0.985) | 0.948 (0.923–0.969) | 0.945 (0.918–0.970) | 0.938 (0.911–0.961) | 0.945 (0.922–0.968) |
| **mixtral:8x7b** | 0.915 (0.883–0.943) | 0.947 (0.922–0.969) | 0.959 (0.937–0.978) | 0.943 (0.915–0.969) | 0.905 (0.872–0.935) | 0.914 (0.882–0.944) | 0.916 (0.883–0.945) | 0.909 (0.875–0.939) |
| **phi3:14b** | 0.875 (0.833–0.911) | 0.939 (0.910–0.964) | 0.922 (0.886–0.950) | 0.931 (0.900–0.959) | 0.889 (0.851–0.924) | 0.901 (0.863–0.935) | 0.916 (0.880–0.948) | 0.845 (0.806–0.885) |
| **phi4:14b** | 0.947 (0.921–0.972) | 0.956 (0.930–0.978) | 0.957 (0.932–0.978) | 0.955 (0.931–0.976) | 0.943 (0.918–0.966) | 0.934 (0.908–0.960) | 0.948 (0.925–0.971) | 0.947 (0.922–0.969) |

**Supplementary Table 6: Micro-averaged performance metrics for diagnosis classes with 95% confidence intervals for all models across prompts 1-7.** *PPV, positive predictive value; NPV, negative predictive value*

| **Model** | **Prompt** | **Accuracy** | **Sensitivity (Recall)** | **Specificity** | **PPV (Precision)** | **NPV** | **F1 score** |
| --- | --- | --- | --- | --- | --- | --- | --- |
| cogito:8b | Prompt 1 | 0.958 (0.953–0.963) | 0.818 (0.779–0.851) | 0.972 (0.967–0.976) | 0.733 (0.693–0.770) | 0.982 (0.978–0.986) | 0.773 (0.743–0.802) |
| cogito:8b | Prompt 2 | 0.945 (0.938–0.951) | 0.901 (0.869–0.925) | 0.949 (0.942–0.955) | 0.631 (0.593–0.668) | 0.990 (0.987–0.993) | 0.742 (0.712–0.771) |
| cogito:8b | Prompt 3 | 0.949 (0.943–0.955) | 0.886 (0.853–0.911) | 0.956 (0.949–0.961) | 0.665 (0.626–0.701) | 0.988 (0.985–0.991) | 0.759 (0.730–0.788) |
| cogito:8b | Prompt 4 | 0.961 (0.956–0.966) | 0.947 (0.923–0.964) | 0.963 (0.957–0.968) | 0.716 (0.680–0.750) | 0.995 (0.992–0.996) | 0.816 (0.790–0.841) |
| cogito:8b | Prompt 5a | 0.963 (0.958–0.968) | 0.948 (0.925–0.965) | 0.965 (0.959–0.970) | 0.730 (0.694–0.763) | 0.995 (0.992–0.996) | 0.825 (0.800–0.848) |
| cogito:8b | Prompt 5b | 0.948 (0.942–0.954) | 0.935 (0.910–0.954) | 0.950 (0.943–0.955) | 0.657 (0.621–0.691) | 0.993 (0.990–0.995) | 0.772 (0.745–0.798) |
| cogito:8b | Prompt 6 | 0.946 (0.940–0.952) | 0.945 (0.922–0.962) | 0.946 (0.939–0.952) | 0.645 (0.609–0.679) | 0.994 (0.991–0.996) | 0.767 (0.738–0.792) |
| cogito:8b | Prompt 7 | 0.949 (0.943–0.955) | 0.932 (0.906–0.951) | 0.951 (0.945–0.957) | 0.671 (0.635–0.705) | 0.992 (0.989–0.995) | 0.780 (0.753–0.805) |
| cogito:14b | Prompt 1 | 0.968 (0.963–0.972) | 0.904 (0.873–0.928) | 0.974 (0.969–0.978) | 0.769 (0.731–0.803) | 0.991 (0.987–0.993) | 0.831 (0.805–0.856) |
| cogito:14b | Prompt 2 | 0.974 (0.969–0.978) | 0.959 (0.936–0.974) | 0.975 (0.970–0.980) | 0.793 (0.756–0.825) | 0.996 (0.994–0.997) | 0.868 (0.845–0.890) |
| cogito:14b | Prompt 3 | 0.973 (0.968–0.977) | 0.956 (0.933–0.971) | 0.975 (0.970–0.979) | 0.790 (0.754–0.822) | 0.996 (0.993–0.997) | 0.865 (0.842–0.888) |
| cogito:14b | Prompt 4 | 0.978 (0.974–0.982) | 0.976 (0.957–0.986) | 0.978 (0.974–0.982) | 0.816 (0.781–0.846) | 0.998 (0.996–0.999) | 0.888 (0.867–0.909) |
| cogito:14b | Prompt 5a | 0.965 (0.960–0.970) | 0.979 (0.962–0.989) | 0.964 (0.958–0.969) | 0.728 (0.692–0.761) | 0.998 (0.996–0.999) | 0.835 (0.811–0.858) |
| cogito:14b | Prompt 5b | 0.967 (0.962–0.972) | 0.983 (0.967–0.991) | 0.966 (0.960–0.971) | 0.744 (0.709–0.777) | 0.998 (0.997–0.999) | 0.847 (0.824–0.869) |
| cogito:14b | Prompt 6 | 0.963 (0.957–0.968) | 0.973 (0.955–0.984) | 0.962 (0.956–0.967) | 0.724 (0.688–0.757) | 0.997 (0.995–0.998) | 0.830 (0.806–0.854) |
| cogito:14b | Prompt 7 | 0.949 (0.943–0.955) | 0.988 (0.974–0.994) | 0.945 (0.938–0.951) | 0.654 (0.619–0.687) | 0.999 (0.997–0.999) | 0.787 (0.762–0.812) |
| cogito:32b | Prompt 1 | 0.978 (0.973–0.981) | 0.933 (0.906–0.952) | 0.982 (0.978–0.985) | 0.837 (0.803–0.866) | 0.993 (0.991–0.995) | 0.882 (0.860–0.902) |
| cogito:32b | Prompt 2 | 0.973 (0.968–0.977) | 0.937 (0.911–0.956) | 0.976 (0.971–0.980) | 0.794 (0.758–0.826) | 0.994 (0.991–0.996) | 0.859 (0.835–0.881) |
| cogito:32b | Prompt 3 | 0.981 (0.977–0.984) | 0.962 (0.940–0.976) | 0.983 (0.978–0.986) | 0.841 (0.806–0.870) | 0.996 (0.994–0.998) | 0.897 (0.876–0.917) |
| cogito:32b | Prompt 4 | 0.979 (0.975–0.982) | 0.961 (0.940–0.975) | 0.981 (0.976–0.984) | 0.831 (0.796–0.860) | 0.996 (0.994–0.998) | 0.891 (0.870–0.911) |
| cogito:32b | Prompt 5a | 0.986 (0.982–0.989) | 0.963 (0.942–0.976) | 0.988 (0.984–0.991) | 0.888 (0.859–0.913) | 0.996 (0.994–0.998) | 0.924 (0.906–0.941) |
| cogito:32b | Prompt 5b | 0.986 (0.983–0.989) | 0.970 (0.950–0.981) | 0.988 (0.985–0.991) | 0.893 (0.864–0.917) | 0.997 (0.995–0.998) | 0.930 (0.914–0.945) |
| cogito:32b | Prompt 6 | 0.986 (0.982–0.989) | 0.964 (0.943–0.977) | 0.988 (0.985–0.991) | 0.893 (0.864–0.917) | 0.996 (0.994–0.998) | 0.927 (0.910–0.942) |
| cogito:32b | Prompt 7 | 0.975 (0.971–0.979) | 0.980 (0.963–0.989) | 0.975 (0.970–0.979) | 0.800 (0.766–0.830) | 0.998 (0.996–0.999) | 0.881 (0.860–0.900) |
| deepseek-r1:14b | Prompt 1 | 0.977 (0.973–0.981) | 0.875 (0.843–0.901) | 0.987 (0.984–0.990) | 0.877 (0.845–0.903) | 0.987 (0.984–0.990) | 0.876 (0.853–0.897) |
| deepseek-r1:14b | Prompt 2 | 0.979 (0.974–0.982) | 0.926 (0.899–0.946) | 0.984 (0.980–0.987) | 0.853 (0.821–0.881) | 0.992 (0.990–0.995) | 0.888 (0.866–0.907) |
| deepseek-r1:14b | Prompt 3 | 0.977 (0.973–0.981) | 0.899 (0.869–0.923) | 0.985 (0.981–0.988) | 0.855 (0.822–0.883) | 0.990 (0.987–0.992) | 0.877 (0.855–0.898) |
| deepseek-r1:14b | Prompt 4 | 0.980 (0.976–0.984) | 0.941 (0.917–0.959) | 0.984 (0.980–0.987) | 0.858 (0.826–0.885) | 0.994 (0.991–0.996) | 0.897 (0.877–0.917) |
| deepseek-r1:14b | Prompt 5a | 0.986 (0.983–0.989) | 0.928 (0.902–0.947) | 0.992 (0.989–0.994) | 0.922 (0.896–0.943) | 0.993 (0.990–0.995) | 0.925 (0.907–0.942) |
| deepseek-r1:14b | Prompt 5b | 0.985 (0.982–0.988) | 0.930 (0.904–0.949) | 0.991 (0.988–0.993) | 0.914 (0.886–0.935) | 0.993 (0.990–0.995) | 0.922 (0.904–0.938) |
| deepseek-r1:14b | Prompt 6 | 0.987 (0.984–0.990) | 0.942 (0.918–0.959) | 0.992 (0.989–0.994) | 0.922 (0.896–0.942) | 0.994 (0.991–0.996) | 0.932 (0.916–0.947) |
| deepseek-r1:14b | Prompt 7 | 0.988 (0.985–0.991) | 0.976 (0.958–0.986) | 0.989 (0.986–0.992) | 0.905 (0.878–0.927) | 0.998 (0.996–0.999) | 0.939 (0.923–0.953) |
| deepseek-r1:32b | Prompt 1 | 0.977 (0.973–0.981) | 0.924 (0.897–0.944) | 0.983 (0.978–0.986) | 0.842 (0.809–0.871) | 0.992 (0.989–0.994) | 0.881 (0.860–0.901) |
| deepseek-r1:32b | Prompt 2 | 0.977 (0.973–0.981) | 0.953 (0.930–0.968) | 0.979 (0.975–0.983) | 0.824 (0.790–0.853) | 0.995 (0.993–0.997) | 0.883 (0.862–0.904) |
| deepseek-r1:32b | Prompt 3 | 0.978 (0.973–0.981) | 0.939 (0.914–0.957) | 0.982 (0.977–0.985) | 0.839 (0.806–0.868) | 0.994 (0.991–0.996) | 0.886 (0.865–0.906) |
| deepseek-r1:32b | Prompt 4 | 0.979 (0.975–0.983) | 0.949 (0.926–0.965) | 0.983 (0.978–0.986) | 0.848 (0.815–0.875) | 0.995 (0.992–0.996) | 0.895 (0.876–0.915) |
| deepseek-r1:32b | Prompt 5a | 0.987 (0.984–0.990) | 0.956 (0.934–0.971) | 0.991 (0.987–0.993) | 0.912 (0.885–0.934) | 0.995 (0.993–0.997) | 0.934 (0.917–0.949) |
| deepseek-r1:32b | Prompt 5b | 0.989 (0.986–0.991) | 0.962 (0.942–0.976) | 0.992 (0.989–0.994) | 0.922 (0.896–0.942) | 0.996 (0.994–0.997) | 0.942 (0.927–0.956) |
| deepseek-r1:32b | Prompt 6 | 0.990 (0.987–0.992) | 0.966 (0.946–0.979) | 0.992 (0.989–0.994) | 0.927 (0.902–0.947) | 0.996 (0.994–0.998) | 0.946 (0.931–0.960) |
| deepseek-r1:32b | Prompt 7 | 0.985 (0.981–0.988) | 0.976 (0.959–0.986) | 0.986 (0.982–0.989) | 0.878 (0.848–0.903) | 0.997 (0.996–0.999) | 0.924 (0.907–0.941) |
| gemini-1.5-flash | Prompt 1 | 0.970 (0.965–0.974) | 0.919 (0.892–0.940) | 0.975 (0.970–0.979) | 0.790 (0.755–0.822) | 0.992 (0.989–0.994) | 0.850 (0.826–0.873) |
| gemini-1.5-flash | Prompt 2 | 0.976 (0.971–0.979) | 0.934 (0.908–0.953) | 0.980 (0.975–0.983) | 0.820 (0.785–0.850) | 0.993 (0.991–0.995) | 0.873 (0.850–0.895) |
| gemini-1.5-flash | Prompt 3 | 0.976 (0.971–0.980) | 0.922 (0.894–0.943) | 0.981 (0.977–0.985) | 0.827 (0.791–0.857) | 0.992 (0.989–0.994) | 0.872 (0.849–0.893) |
| gemini-1.5-flash | Prompt 4 | 0.980 (0.976–0.983) | 0.970 (0.951–0.982) | 0.981 (0.977–0.984) | 0.834 (0.800–0.862) | 0.997 (0.995–0.998) | 0.897 (0.876–0.915) |
| gemini-1.5-flash | Prompt 5a | 0.984 (0.981–0.987) | 0.967 (0.948–0.980) | 0.986 (0.982–0.989) | 0.876 (0.846–0.901) | 0.997 (0.995–0.998) | 0.920 (0.901–0.936) |
| gemini-1.5-flash | Prompt 5b | 0.991 (0.988–0.993) | 0.990 (0.976–0.996) | 0.991 (0.988–0.994) | 0.920 (0.894–0.941) | 0.999 (0.998–1.000) | 0.954 (0.940–0.967) |
| gemini-1.5-flash | Prompt 6 | 0.990 (0.987–0.993) | 0.980 (0.963–0.989) | 0.991 (0.988–0.994) | 0.921 (0.894–0.941) | 0.998 (0.996–0.999) | 0.949 (0.935–0.962) |
| gemini-1.5-flash | Prompt 7 | 0.984 (0.980–0.987) | 0.968 (0.948–0.980) | 0.986 (0.982–0.989) | 0.873 (0.842–0.898) | 0.997 (0.995–0.998) | 0.918 (0.900–0.934) |
| gemini-1.5-pro | Prompt 1 | 0.974 (0.970–0.978) | 0.932 (0.906–0.951) | 0.979 (0.974–0.982) | 0.819 (0.785–0.848) | 0.993 (0.990–0.995) | 0.872 (0.850–0.893) |
| gemini-1.5-pro | Prompt 2 | 0.975 (0.971–0.979) | 0.933 (0.908–0.952) | 0.980 (0.975–0.983) | 0.825 (0.792–0.854) | 0.993 (0.990–0.995) | 0.876 (0.854–0.897) |
| gemini-1.5-pro | Prompt 3 | 0.973 (0.969–0.977) | 0.923 (0.897–0.944) | 0.978 (0.974–0.982) | 0.813 (0.779–0.844) | 0.992 (0.989–0.994) | 0.865 (0.842–0.886) |
| gemini-1.5-pro | Prompt 4 | 0.979 (0.975–0.983) | 0.947 (0.924–0.964) | 0.982 (0.978–0.986) | 0.845 (0.813–0.873) | 0.995 (0.992–0.996) | 0.893 (0.873–0.913) |
| gemini-1.5-pro | Prompt 5a | 0.990 (0.987–0.993) | 0.930 (0.905–0.950) | 0.997 (0.994–0.998) | 0.965 (0.945–0.978) | 0.993 (0.990–0.995) | 0.947 (0.932–0.961) |
| gemini-1.5-pro | Prompt 5b | 0.991 (0.988–0.993) | 0.984 (0.969–0.992) | 0.991 (0.988–0.994) | 0.922 (0.896–0.942) | 0.998 (0.997–0.999) | 0.952 (0.938–0.965) |
| gemini-1.5-pro | Prompt 6 | 0.990 (0.988–0.993) | 0.970 (0.951–0.982) | 0.993 (0.990–0.995) | 0.931 (0.906–0.950) | 0.997 (0.995–0.998) | 0.950 (0.936–0.963) |
| gemini-1.5-pro | Prompt 7 | 0.988 (0.985–0.991) | 0.988 (0.974–0.995) | 0.988 (0.985–0.991) | 0.899 (0.871–0.921) | 0.999 (0.997–0.999) | 0.941 (0.926–0.955) |
| gemini-2.5-flash | Prompt 1 | 0.979 (0.974–0.982) | 0.927 (0.901–0.946) | 0.984 (0.980–0.987) | 0.857 (0.825–0.884) | 0.992 (0.989–0.994) | 0.891 (0.870–0.909) |
| gemini-2.5-flash | Prompt 2 | 0.978 (0.974–0.981) | 0.948 (0.925–0.964) | 0.981 (0.977–0.984) | 0.838 (0.805–0.866) | 0.995 (0.992–0.996) | 0.890 (0.869–0.909) |
| gemini-2.5-flash | Prompt 3 | 0.977 (0.973–0.981) | 0.920 (0.893–0.941) | 0.983 (0.979–0.986) | 0.847 (0.814–0.875) | 0.992 (0.989–0.994) | 0.882 (0.860–0.902) |
| gemini-2.5-flash | Prompt 4 | 0.983 (0.979–0.986) | 0.948 (0.925–0.964) | 0.986 (0.982–0.989) | 0.877 (0.846–0.902) | 0.995 (0.992–0.996) | 0.911 (0.893–0.929) |
| gemini-2.5-flash | Prompt 5a | 0.994 (0.992–0.996) | 0.972 (0.954–0.983) | 0.997 (0.994–0.998) | 0.967 (0.947–0.979) | 0.997 (0.995–0.998) | 0.969 (0.958–0.980) |
| gemini-2.5-flash | Prompt 5b | 0.995 (0.993–0.997) | 0.978 (0.962–0.988) | 0.997 (0.995–0.998) | 0.973 (0.954–0.984) | 0.998 (0.996–0.999) | 0.975 (0.965–0.984) |
| gemini-2.5-flash | Prompt 6 | 0.995 (0.992–0.996) | 0.972 (0.954–0.983) | 0.997 (0.995–0.998) | 0.970 (0.952–0.982) | 0.997 (0.995–0.998) | 0.971 (0.961–0.981) |
| gemini-2.5-flash | Prompt 7 | 0.995 (0.993–0.997) | 0.992 (0.980–0.997) | 0.995 (0.993–0.997) | 0.958 (0.937–0.972) | 0.999 (0.998–1.000) | 0.975 (0.965–0.984) |
| gemini-2.5-flash-updated | Prompt 1 | 0.977 (0.972–0.981) | 0.941 (0.917–0.958) | 0.981 (0.976–0.984) | 0.835 (0.803–0.864) | 0.994 (0.991–0.996) | 0.885 (0.865–0.904) |
| gemini-2.5-flash-updated | Prompt 2 | 0.977 (0.972–0.981) | 0.968 (0.948–0.980) | 0.978 (0.973–0.982) | 0.820 (0.787–0.849) | 0.997 (0.994–0.998) | 0.888 (0.867–0.906) |
| gemini-2.5-flash-updated | Prompt 3 | 0.975 (0.970–0.978) | 0.940 (0.916–0.958) | 0.978 (0.974–0.982) | 0.817 (0.783–0.846) | 0.994 (0.991–0.996) | 0.874 (0.852–0.895) |
| gemini-2.5-flash-updated | Prompt 4 | 0.982 (0.978–0.985) | 0.966 (0.946–0.979) | 0.983 (0.979–0.987) | 0.857 (0.826–0.883) | 0.996 (0.994–0.998) | 0.908 (0.890–0.926) |
| gemini-2.5-flash-updated | Prompt 5a | 0.993 (0.991–0.995) | 0.988 (0.974–0.995) | 0.994 (0.991–0.996) | 0.945 (0.923–0.962) | 0.999 (0.997–0.999) | 0.966 (0.955–0.977) |
| gemini-2.5-flash-updated | Prompt 5b | 0.994 (0.992–0.996) | 0.980 (0.964–0.989) | 0.996 (0.994–0.997) | 0.961 (0.941–0.975) | 0.998 (0.996–0.999) | 0.971 (0.960–0.981) |
| gemini-2.5-flash-updated | Prompt 6 | 0.996 (0.994–0.997) | 0.982 (0.967–0.991) | 0.997 (0.995–0.998) | 0.975 (0.957–0.985) | 0.998 (0.996–0.999) | 0.978 (0.969–0.987) |
| gemini-2.5-flash-updated | Prompt 7 | 0.993 (0.990–0.995) | 0.992 (0.980–0.997) | 0.993 (0.990–0.995) | 0.933 (0.909–0.951) | 0.999 (0.998–1.000) | 0.962 (0.950–0.973) |
| gemma2:2b | Prompt 1 | 0.935 (0.928–0.942) | 0.525 (0.481–0.568) | 0.978 (0.974–0.982) | 0.717 (0.668–0.760) | 0.952 (0.945–0.957) | 0.606 (0.566–0.644) |
| gemma2:2b | Prompt 2 | 0.951 (0.945–0.957) | 0.870 (0.837–0.897) | 0.960 (0.954–0.965) | 0.694 (0.656–0.729) | 0.986 (0.982–0.989) | 0.772 (0.743–0.799) |
| gemma2:2b | Prompt 3 | 0.956 (0.950–0.961) | 0.848 (0.814–0.877) | 0.967 (0.961–0.971) | 0.723 (0.685–0.758) | 0.984 (0.980–0.987) | 0.781 (0.751–0.808) |
| gemma2:2b | Prompt 4 | 0.951 (0.945–0.957) | 0.842 (0.807–0.871) | 0.962 (0.957–0.967) | 0.696 (0.658–0.732) | 0.983 (0.979–0.987) | 0.762 (0.734–0.790) |
| gemma2:2b | Prompt 5a | 0.901 (0.892–0.908) | 0.679 (0.637–0.719) | 0.924 (0.916–0.931) | 0.482 (0.446–0.519) | 0.965 (0.959–0.970) | 0.564 (0.530–0.596) |
| gemma2:2b | Prompt 5b | 0.922 (0.914–0.929) | 0.756 (0.716–0.792) | 0.939 (0.932–0.945) | 0.557 (0.519–0.594) | 0.974 (0.969–0.978) | 0.641 (0.609–0.672) |
| gemma2:2b | Prompt 6 | 0.917 (0.910–0.924) | 0.578 (0.533–0.621) | 0.952 (0.945–0.958) | 0.551 (0.507–0.593) | 0.957 (0.951–0.962) | 0.564 (0.527–0.599) |
| gemma2:2b | Prompt 7 | 0.935 (0.927–0.941) | 0.735 (0.694–0.772) | 0.955 (0.949–0.961) | 0.631 (0.591–0.670) | 0.972 (0.967–0.976) | 0.679 (0.646–0.711) |
| gemma2:9b | Prompt 1 | 0.970 (0.965–0.975) | 0.848 (0.812–0.879) | 0.982 (0.978–0.985) | 0.818 (0.780–0.851) | 0.985 (0.981–0.988) | 0.833 (0.805–0.857) |
| gemma2:9b | Prompt 2 | 0.975 (0.971–0.979) | 0.875 (0.841–0.902) | 0.985 (0.981–0.988) | 0.848 (0.813–0.878) | 0.988 (0.984–0.991) | 0.861 (0.836–0.884) |
| gemma2:9b | Prompt 3 | 0.969 (0.964–0.974) | 0.865 (0.831–0.893) | 0.980 (0.975–0.983) | 0.807 (0.770–0.839) | 0.987 (0.983–0.989) | 0.835 (0.809–0.859) |
| gemma2:9b | Prompt 4 | 0.974 (0.970–0.978) | 0.950 (0.927–0.967) | 0.977 (0.972–0.981) | 0.803 (0.768–0.834) | 0.995 (0.992–0.997) | 0.871 (0.848–0.892) |
| gemma2:9b | Prompt 5a | 0.970 (0.965–0.975) | 0.972 (0.953–0.983) | 0.970 (0.965–0.975) | 0.772 (0.737–0.803) | 0.997 (0.995–0.998) | 0.860 (0.837–0.881) |
| gemma2:9b | Prompt 5b | 0.974 (0.969–0.978) | 0.973 (0.955–0.984) | 0.974 (0.969–0.978) | 0.795 (0.760–0.825) | 0.997 (0.995–0.998) | 0.875 (0.853–0.895) |
| gemma2:9b | Prompt 6 | 0.963 (0.958–0.968) | 0.966 (0.946–0.979) | 0.963 (0.957–0.968) | 0.729 (0.694–0.762) | 0.996 (0.994–0.998) | 0.831 (0.807–0.854) |
| gemma2:9b | Prompt 7 | 0.981 (0.977–0.984) | 0.969 (0.950–0.981) | 0.982 (0.978–0.985) | 0.847 (0.814–0.874) | 0.997 (0.995–0.998) | 0.904 (0.884–0.921) |
| gemma2:27b | Prompt 1 | 0.966 (0.961–0.971) | 0.934 (0.907–0.953) | 0.970 (0.964–0.974) | 0.764 (0.726–0.797) | 0.993 (0.990–0.995) | 0.840 (0.815–0.864) |
| gemma2:27b | Prompt 2 | 0.966 (0.961–0.971) | 0.931 (0.904–0.951) | 0.970 (0.964–0.975) | 0.771 (0.734–0.804) | 0.992 (0.989–0.995) | 0.844 (0.819–0.867) |
| gemma2:27b | Prompt 3 | 0.965 (0.960–0.970) | 0.920 (0.892–0.942) | 0.970 (0.964–0.974) | 0.759 (0.722–0.793) | 0.992 (0.988–0.994) | 0.832 (0.806–0.857) |
| gemma2:27b | Prompt 4 | 0.981 (0.977–0.984) | 0.987 (0.972–0.994) | 0.980 (0.976–0.984) | 0.838 (0.805–0.866) | 0.999 (0.997–0.999) | 0.906 (0.887–0.925) |
| gemma2:27b | Prompt 5a | 0.972 (0.967–0.976) | 0.984 (0.969–0.992) | 0.971 (0.966–0.975) | 0.778 (0.744–0.809) | 0.998 (0.997–0.999) | 0.869 (0.848–0.889) |
| gemma2:27b | Prompt 5b | 0.964 (0.958–0.969) | 0.986 (0.971–0.993) | 0.961 (0.955–0.967) | 0.732 (0.698–0.765) | 0.998 (0.997–0.999) | 0.840 (0.816–0.862) |
| gemma2:27b | Prompt 6 | 0.972 (0.967–0.976) | 0.970 (0.951–0.982) | 0.972 (0.967–0.977) | 0.788 (0.753–0.818) | 0.997 (0.995–0.998) | 0.869 (0.847–0.889) |
| gemma2:27b | Prompt 7 | 0.973 (0.968–0.977) | 0.982 (0.966–0.991) | 0.972 (0.966–0.976) | 0.800 (0.766–0.829) | 0.998 (0.996–0.999) | 0.882 (0.861–0.901) |
| medgemma:27b | Prompt 1 | 0.976 (0.971–0.980) | 0.873 (0.841–0.900) | 0.986 (0.983–0.989) | 0.867 (0.834–0.894) | 0.987 (0.983–0.990) | 0.870 (0.847–0.892) |
| medgemma:27b | Prompt 2 | 0.976 (0.971–0.979) | 0.872 (0.840–0.898) | 0.986 (0.983–0.989) | 0.867 (0.834–0.894) | 0.987 (0.983–0.990) | 0.869 (0.846–0.891) |
| medgemma:27b | Prompt 3 | 0.975 (0.970–0.979) | 0.852 (0.819–0.881) | 0.988 (0.984–0.990) | 0.877 (0.845–0.903) | 0.985 (0.981–0.988) | 0.864 (0.842–0.886) |
| medgemma:27b | Prompt 4 | 0.981 (0.977–0.984) | 0.906 (0.877–0.929) | 0.988 (0.985–0.991) | 0.890 (0.860–0.914) | 0.990 (0.987–0.993) | 0.898 (0.877–0.917) |
| medgemma:27b | Prompt 5a | 0.984 (0.980–0.987) | 0.897 (0.868–0.921) | 0.993 (0.990–0.995) | 0.930 (0.904–0.950) | 0.989 (0.986–0.992) | 0.913 (0.895–0.931) |
| medgemma:27b | Prompt 5b | 0.984 (0.980–0.987) | 0.862 (0.829–0.889) | 0.997 (0.995–0.998) | 0.967 (0.946–0.980) | 0.986 (0.982–0.989) | 0.911 (0.891–0.929) |
| medgemma:27b | Prompt 6 | 0.980 (0.976–0.984) | 0.816 (0.780–0.848) | 0.997 (0.995–0.998) | 0.969 (0.948–0.982) | 0.981 (0.977–0.985) | 0.886 (0.864–0.907) |
| medgemma:27b | Prompt 7 | 0.987 (0.984–0.990) | 0.939 (0.914–0.956) | 0.992 (0.990–0.994) | 0.928 (0.902–0.947) | 0.994 (0.991–0.996) | 0.933 (0.916–0.948) |
| gpt-oss:20b | Prompt 1 | 0.981 (0.977–0.985) | 0.933 (0.908–0.952) | 0.986 (0.982–0.989) | 0.873 (0.842–0.899) | 0.993 (0.990–0.995) | 0.902 (0.883–0.921) |
| gpt-oss:20b | Prompt 2 | 0.982 (0.978–0.985) | 0.943 (0.919–0.960) | 0.986 (0.982–0.989) | 0.872 (0.841–0.898) | 0.994 (0.992–0.996) | 0.906 (0.886–0.924) |
| gpt-oss:20b | Prompt 3 | 0.983 (0.979–0.986) | 0.902 (0.873–0.925) | 0.991 (0.988–0.993) | 0.913 (0.885–0.935) | 0.990 (0.987–0.992) | 0.907 (0.888–0.926) |
| gpt-oss:20b | Prompt 4 | 0.986 (0.982–0.989) | 0.924 (0.897–0.944) | 0.992 (0.989–0.994) | 0.924 (0.897–0.944) | 0.992 (0.989–0.994) | 0.924 (0.905–0.940) |
| gpt-oss:20b | Prompt 5a | 0.990 (0.987–0.992) | 0.917 (0.890–0.938) | 0.998 (0.996–0.999) | 0.975 (0.957–0.986) | 0.991 (0.988–0.994) | 0.945 (0.930–0.960) |
| gpt-oss:20b | Prompt 5b | 0.991 (0.988–0.993) | 0.927 (0.901–0.947) | 0.998 (0.996–0.999) | 0.977 (0.960–0.987) | 0.992 (0.990–0.995) | 0.951 (0.937–0.965) |
| gpt-oss:20b | Prompt 6 | 0.989 (0.986–0.991) | 0.893 (0.864–0.917) | 0.999 (0.997–0.999) | 0.987 (0.972–0.994) | 0.989 (0.986–0.992) | 0.938 (0.922–0.953) |
| gpt-oss:20b | Prompt 7 | 0.992 (0.989–0.994) | 0.970 (0.952–0.982) | 0.994 (0.992–0.996) | 0.946 (0.923–0.962) | 0.997 (0.995–0.998) | 0.958 (0.945–0.970) |
| llama3.1:8b | Prompt 1 | 0.946 (0.939–0.952) | 0.873 (0.839–0.900) | 0.953 (0.946–0.959) | 0.645 (0.607–0.681) | 0.987 (0.983–0.990) | 0.742 (0.711–0.771) |
| llama3.1:8b | Prompt 2 | 0.930 (0.923–0.937) | 0.893 (0.862–0.918) | 0.934 (0.926–0.941) | 0.572 (0.536–0.607) | 0.989 (0.985–0.991) | 0.697 (0.667–0.727) |
| llama3.1:8b | Prompt 3 | 0.929 (0.922–0.936) | 0.898 (0.868–0.922) | 0.932 (0.925–0.939) | 0.574 (0.538–0.608) | 0.989 (0.986–0.992) | 0.700 (0.670–0.729) |
| llama3.1:8b | Prompt 4 | 0.945 (0.939–0.951) | 0.946 (0.922–0.963) | 0.945 (0.938–0.951) | 0.633 (0.598–0.668) | 0.994 (0.992–0.996) | 0.759 (0.730–0.785) |
| llama3.1:8b | Prompt 5a | 0.920 (0.913–0.927) | 0.966 (0.947–0.979) | 0.916 (0.907–0.923) | 0.543 (0.511–0.576) | 0.996 (0.994–0.998) | 0.696 (0.669–0.722) |
| llama3.1:8b | Prompt 5b | 0.816 (0.805–0.826) | 0.902 (0.873–0.925) | 0.807 (0.795–0.818) | 0.327 (0.303–0.352) | 0.988 (0.984–0.991) | 0.480 (0.451–0.507) |
| llama3.1:8b | Prompt 6 | 0.803 (0.792–0.813) | 0.920 (0.893–0.941) | 0.791 (0.779–0.802) | 0.313 (0.290–0.337) | 0.990 (0.986–0.992) | 0.467 (0.439–0.494) |
| llama3.1:8b | Prompt 7 | 0.805 (0.794–0.816) | 0.948 (0.925–0.965) | 0.789 (0.777–0.801) | 0.335 (0.311–0.360) | 0.993 (0.989–0.995) | 0.495 (0.467–0.522) |
| llama3.3:70b | Prompt 1 | 0.977 (0.973–0.981) | 0.969 (0.949–0.981) | 0.978 (0.973–0.982) | 0.814 (0.780–0.844) | 0.997 (0.995–0.998) | 0.884 (0.864–0.904) |
| llama3.3:70b | Prompt 2 | 0.977 (0.973–0.981) | 0.971 (0.951–0.982) | 0.978 (0.974–0.982) | 0.815 (0.781–0.845) | 0.997 (0.995–0.998) | 0.886 (0.866–0.906) |
| llama3.3:70b | Prompt 3 | 0.975 (0.971–0.979) | 0.956 (0.933–0.971) | 0.977 (0.973–0.981) | 0.805 (0.771–0.836) | 0.996 (0.993–0.997) | 0.874 (0.852–0.895) |
| llama3.3:70b | Prompt 4 | 0.981 (0.977–0.985) | 0.990 (0.976–0.996) | 0.981 (0.976–0.984) | 0.837 (0.805–0.865) | 0.999 (0.998–1.000) | 0.907 (0.889–0.925) |
| llama3.3:70b | Prompt 5a | 0.982 (0.978–0.985) | 0.994 (0.983–0.998) | 0.981 (0.976–0.984) | 0.842 (0.810–0.869) | 0.999 (0.998–1.000) | 0.912 (0.893–0.928) |
| llama3.3:70b | Prompt 5b | 0.981 (0.977–0.984) | 0.996 (0.986–0.999) | 0.979 (0.975–0.983) | 0.831 (0.799–0.858) | 1.000 (0.998–1.000) | 0.906 (0.887–0.923) |
| llama3.3:70b | Prompt 6 | 0.981 (0.977–0.984) | 0.994 (0.983–0.998) | 0.980 (0.975–0.983) | 0.834 (0.803–0.862) | 0.999 (0.998–1.000) | 0.907 (0.889–0.924) |
| llama3.3:70b | Prompt 7 | 0.974 (0.969–0.978) | 0.996 (0.986–0.999) | 0.971 (0.966–0.976) | 0.783 (0.750–0.814) | 1.000 (0.998–1.000) | 0.877 (0.856–0.897) |
| mixtral:8x7b | Prompt 1 | 0.964 (0.959–0.969) | 0.930 (0.905–0.950) | 0.968 (0.962–0.972) | 0.749 (0.713–0.781) | 0.993 (0.990–0.995) | 0.830 (0.805–0.853) |
| mixtral:8x7b | Prompt 2 | 0.959 (0.954–0.964) | 0.958 (0.937–0.972) | 0.959 (0.954–0.965) | 0.709 (0.674–0.742) | 0.995 (0.993–0.997) | 0.815 (0.790–0.839) |
| mixtral:8x7b | Prompt 3 | 0.965 (0.960–0.970) | 0.959 (0.937–0.973) | 0.966 (0.960–0.970) | 0.742 (0.706–0.775) | 0.996 (0.993–0.997) | 0.837 (0.813–0.860) |
| mixtral:8x7b | Prompt 4 | 0.978 (0.974–0.982) | 0.980 (0.963–0.989) | 0.978 (0.973–0.982) | 0.823 (0.790–0.852) | 0.998 (0.996–0.999) | 0.894 (0.875–0.913) |
| mixtral:8x7b | Prompt 5a | 0.978 (0.974–0.981) | 0.913 (0.885–0.935) | 0.985 (0.981–0.988) | 0.860 (0.828–0.887) | 0.991 (0.988–0.993) | 0.886 (0.865–0.905) |
| mixtral:8x7b | Prompt 5b | 0.967 (0.962–0.972) | 0.897 (0.867–0.921) | 0.975 (0.970–0.979) | 0.786 (0.751–0.818) | 0.989 (0.986–0.992) | 0.838 (0.814–0.861) |
| mixtral:8x7b | Prompt 6 | 0.968 (0.963–0.972) | 0.893 (0.863–0.917) | 0.975 (0.971–0.979) | 0.791 (0.756–0.823) | 0.989 (0.985–0.991) | 0.839 (0.815–0.862) |
| mixtral:8x7b | Prompt 7 | 0.973 (0.968–0.977) | 0.963 (0.943–0.977) | 0.974 (0.969–0.978) | 0.791 (0.757–0.822) | 0.996 (0.994–0.998) | 0.869 (0.847–0.890) |
| mistral-small:22b | Prompt 1 | 0.960 (0.954–0.965) | 0.914 (0.885–0.936) | 0.964 (0.959–0.969) | 0.719 (0.682–0.754) | 0.991 (0.988–0.993) | 0.805 (0.778–0.830) |
| mistral-small:22b | Prompt 2 | 0.964 (0.958–0.968) | 0.928 (0.901–0.949) | 0.967 (0.961–0.972) | 0.735 (0.698–0.770) | 0.993 (0.990–0.995) | 0.821 (0.795–0.845) |
| mistral-small:22b | Prompt 3 | 0.969 (0.964–0.973) | 0.949 (0.924–0.966) | 0.971 (0.966–0.975) | 0.762 (0.726–0.796) | 0.995 (0.992–0.997) | 0.846 (0.821–0.869) |
| mistral-small:22b | Prompt 4 | 0.980 (0.976–0.983) | 0.977 (0.959–0.987) | 0.980 (0.976–0.984) | 0.833 (0.800–0.862) | 0.998 (0.996–0.999) | 0.899 (0.880–0.918) |
| mistral-small:22b | Prompt 5a | 0.979 (0.975–0.982) | 0.930 (0.904–0.950) | 0.984 (0.980–0.987) | 0.853 (0.820–0.881) | 0.993 (0.990–0.995) | 0.890 (0.869–0.910) |
| mistral-small:22b | Prompt 5b | 0.958 (0.953–0.964) | 0.952 (0.929–0.967) | 0.959 (0.953–0.964) | 0.707 (0.672–0.740) | 0.995 (0.992–0.996) | 0.811 (0.786–0.836) |
| mistral-small:22b | Prompt 6 | 0.960 (0.954–0.965) | 0.958 (0.936–0.972) | 0.960 (0.954–0.965) | 0.713 (0.677–0.746) | 0.995 (0.993–0.997) | 0.817 (0.792–0.841) |
| mistral-small:22b | Prompt 7 | 0.956 (0.950–0.961) | 0.972 (0.953–0.983) | 0.954 (0.948–0.960) | 0.695 (0.660–0.728) | 0.997 (0.995–0.998) | 0.811 (0.786–0.834) |
| mistral-small3.2:24b | Prompt 1 | 0.976 (0.972–0.980) | 0.921 (0.893–0.941) | 0.982 (0.978–0.985) | 0.837 (0.804–0.866) | 0.992 (0.989–0.994) | 0.877 (0.855–0.897) |
| mistral-small3.2:24b | Prompt 2 | 0.976 (0.972–0.980) | 0.921 (0.893–0.942) | 0.982 (0.977–0.985) | 0.832 (0.798–0.861) | 0.992 (0.989–0.994) | 0.874 (0.852–0.895) |
| mistral-small3.2:24b | Prompt 3 | 0.973 (0.968–0.977) | 0.911 (0.882–0.933) | 0.979 (0.974–0.983) | 0.811 (0.776–0.842) | 0.991 (0.988–0.993) | 0.858 (0.835–0.880) |
| mistral-small3.2:24b | Prompt 4 | 0.979 (0.974–0.982) | 0.954 (0.932–0.970) | 0.981 (0.977–0.985) | 0.835 (0.802–0.864) | 0.995 (0.993–0.997) | 0.891 (0.870–0.910) |
| mistral-small3.2:24b | Prompt 5a | 0.986 (0.982–0.989) | 0.952 (0.930–0.968) | 0.989 (0.986–0.992) | 0.902 (0.874–0.924) | 0.995 (0.993–0.997) | 0.926 (0.909–0.943) |
| mistral-small3.2:24b | Prompt 5b | 0.988 (0.985–0.990) | 0.962 (0.942–0.976) | 0.991 (0.987–0.993) | 0.913 (0.886–0.934) | 0.996 (0.994–0.997) | 0.937 (0.921–0.952) |
| mistral-small3.2:24b | Prompt 6 | 0.987 (0.984–0.990) | 0.952 (0.930–0.968) | 0.991 (0.987–0.993) | 0.912 (0.885–0.934) | 0.995 (0.993–0.997) | 0.932 (0.915–0.947) |
| mistral-small3.2:24b | Prompt 7 | 0.985 (0.981–0.988) | 0.952 (0.930–0.968) | 0.988 (0.985–0.991) | 0.892 (0.863–0.915) | 0.995 (0.993–0.997) | 0.921 (0.903–0.937) |
| phi3:14b | Prompt 1 | 0.945 (0.938–0.950) | 0.780 (0.741–0.814) | 0.962 (0.956–0.967) | 0.681 (0.641–0.718) | 0.977 (0.972–0.981) | 0.727 (0.696–0.756) |
| phi3:14b | Prompt 2 | 0.950 (0.944–0.956) | 0.883 (0.851–0.909) | 0.957 (0.951–0.963) | 0.677 (0.640–0.713) | 0.988 (0.984–0.990) | 0.767 (0.738–0.793) |
| phi3:14b | Prompt 3 | 0.963 (0.957–0.967) | 0.899 (0.869–0.923) | 0.969 (0.964–0.974) | 0.748 (0.711–0.782) | 0.989 (0.986–0.992) | 0.816 (0.789–0.841) |
| phi3:14b | Prompt 4 | 0.962 (0.956–0.967) | 0.937 (0.912–0.956) | 0.964 (0.959–0.969) | 0.728 (0.691–0.762) | 0.993 (0.991–0.995) | 0.819 (0.794–0.843) |
| phi3:14b | Prompt 5a | 0.945 (0.939–0.951) | 0.832 (0.797–0.862) | 0.957 (0.951–0.963) | 0.669 (0.632–0.705) | 0.982 (0.978–0.985) | 0.742 (0.714–0.771) |
| phi3:14b | Prompt 5b | 0.929 (0.922–0.936) | 0.825 (0.790–0.856) | 0.940 (0.933–0.947) | 0.590 (0.553–0.626) | 0.981 (0.977–0.985) | 0.688 (0.658–0.717) |
| phi3:14b | Prompt 6 | 0.931 (0.924–0.938) | 0.751 (0.711–0.787) | 0.950 (0.943–0.956) | 0.610 (0.571–0.648) | 0.973 (0.968–0.978) | 0.673 (0.641–0.704) |
| phi3:14b | Prompt 7 | 0.898 (0.890–0.906) | 0.916 (0.888–0.937) | 0.897 (0.887–0.905) | 0.490 (0.458–0.522) | 0.990 (0.986–0.993) | 0.638 (0.608–0.666) |
| phi4:14b | Prompt 1 | 0.980 (0.975–0.983) | 0.949 (0.925–0.966) | 0.983 (0.978–0.986) | 0.839 (0.804–0.868) | 0.995 (0.993–0.997) | 0.890 (0.868–0.910) |
| phi4:14b | Prompt 2 | 0.982 (0.978–0.985) | 0.964 (0.943–0.978) | 0.984 (0.980–0.987) | 0.846 (0.813–0.875) | 0.997 (0.994–0.998) | 0.901 (0.881–0.920) |
| phi4:14b | Prompt 3 | 0.979 (0.975–0.983) | 0.951 (0.927–0.967) | 0.982 (0.978–0.985) | 0.836 (0.802–0.865) | 0.995 (0.993–0.997) | 0.890 (0.869–0.910) |
| phi4:14b | Prompt 4 | 0.983 (0.979–0.986) | 0.955 (0.932–0.970) | 0.985 (0.982–0.988) | 0.864 (0.832–0.891) | 0.996 (0.993–0.997) | 0.907 (0.887–0.926) |
| phi4:14b | Prompt 5a | 0.983 (0.979–0.986) | 0.974 (0.956–0.985) | 0.984 (0.980–0.987) | 0.861 (0.830–0.888) | 0.997 (0.995–0.998) | 0.914 (0.896–0.931) |
| phi4:14b | Prompt 5b | 0.985 (0.981–0.988) | 0.960 (0.939–0.974) | 0.987 (0.984–0.990) | 0.886 (0.857–0.911) | 0.996 (0.994–0.997) | 0.922 (0.904–0.938) |
| phi4:14b | Prompt 6 | 0.987 (0.983–0.990) | 0.968 (0.948–0.980) | 0.989 (0.985–0.991) | 0.899 (0.870–0.922) | 0.997 (0.995–0.998) | 0.932 (0.915–0.947) |
| phi4:14b | Prompt 7 | 0.985 (0.981–0.988) | 0.972 (0.954–0.983) | 0.986 (0.982–0.989) | 0.879 (0.849–0.904) | 0.997 (0.995–0.998) | 0.923 (0.906–0.939) |

## Supplementary Figures

**Supplementary Figure 1: Figure depicting the structure of Prompt 5a and 5b, which contain all modules described (task definitions, JSON schema and instructions, conditions and description thereof, core principles, and the clinical letter to analyse).** Note that the position of the clinical letter is presented at the end of the prompt in 5a, and towards the beginning (after the initial instructions) in 5b.

**
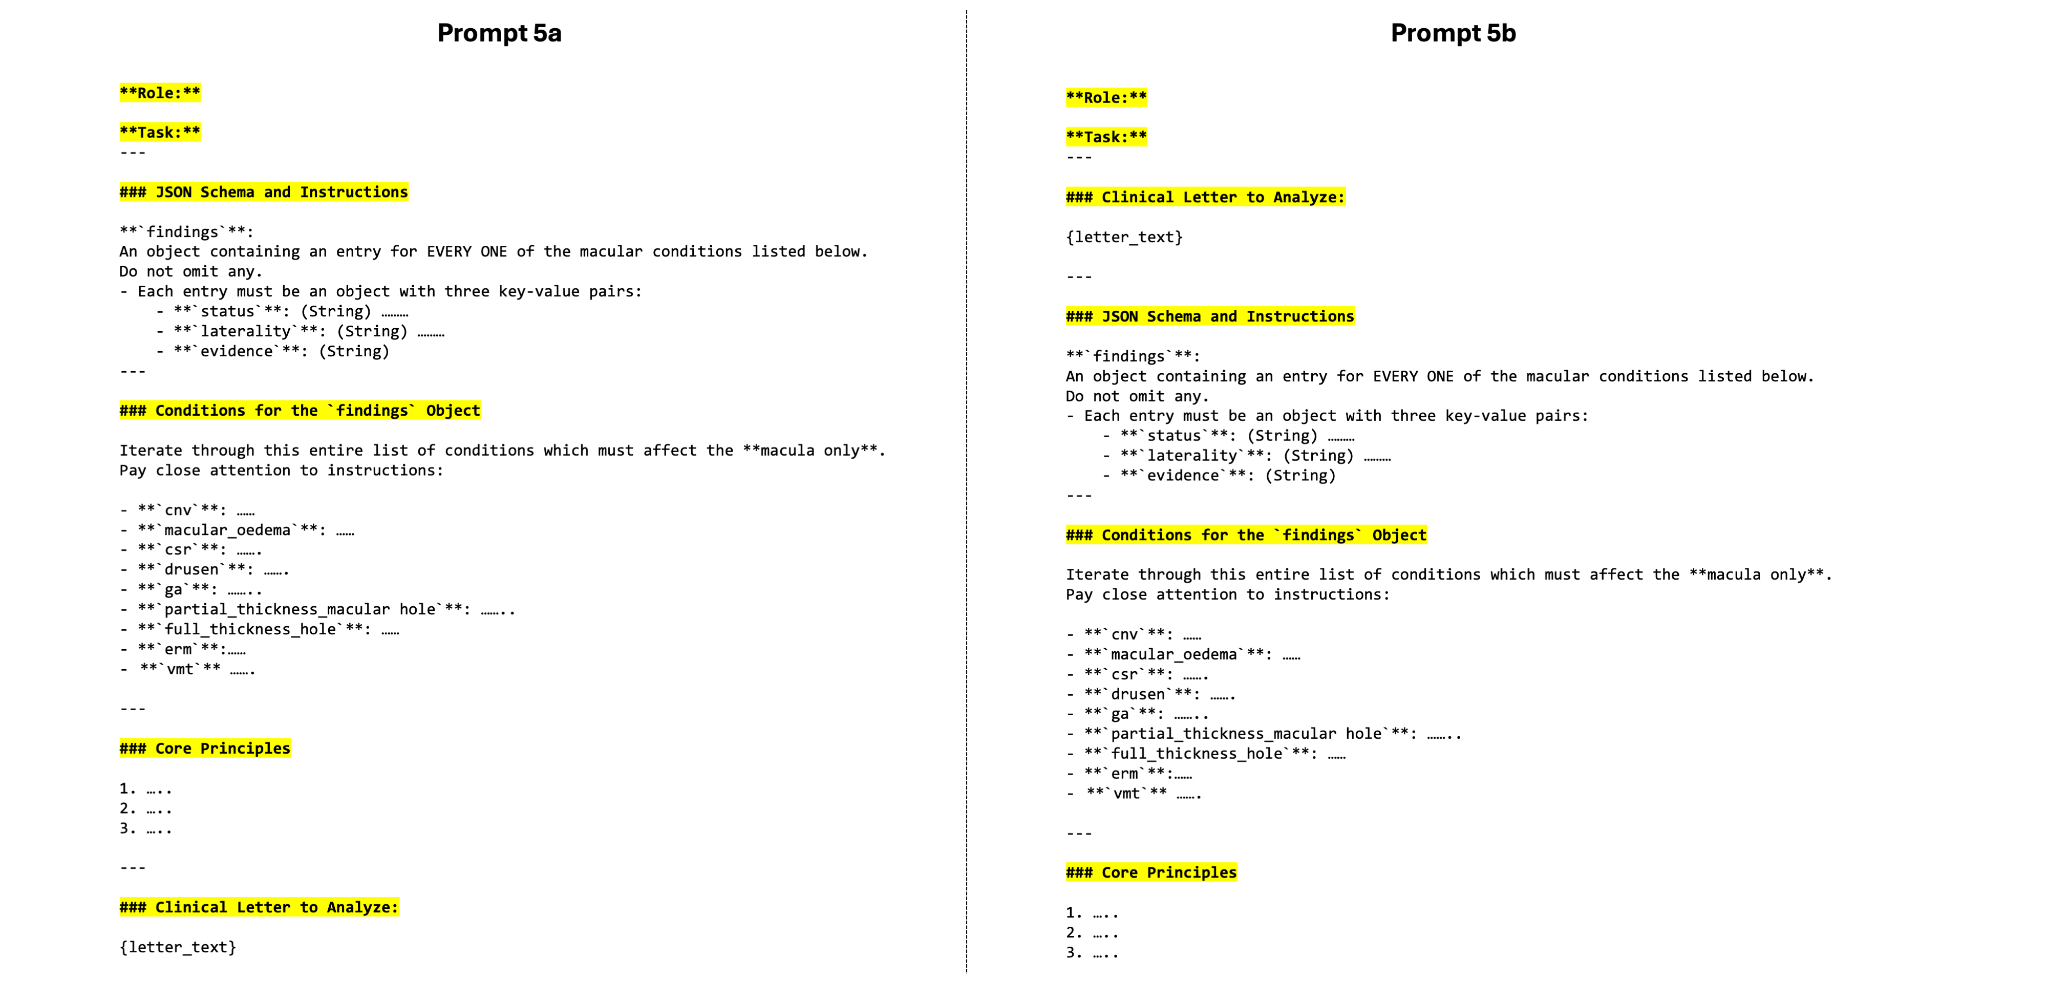
**

**Supplementary Figure 2: Figure depicting a sample clinical letter and the corresponding JSON output.** Note that this is a synthetic letter written by a clinician for illustration purposes only.

**
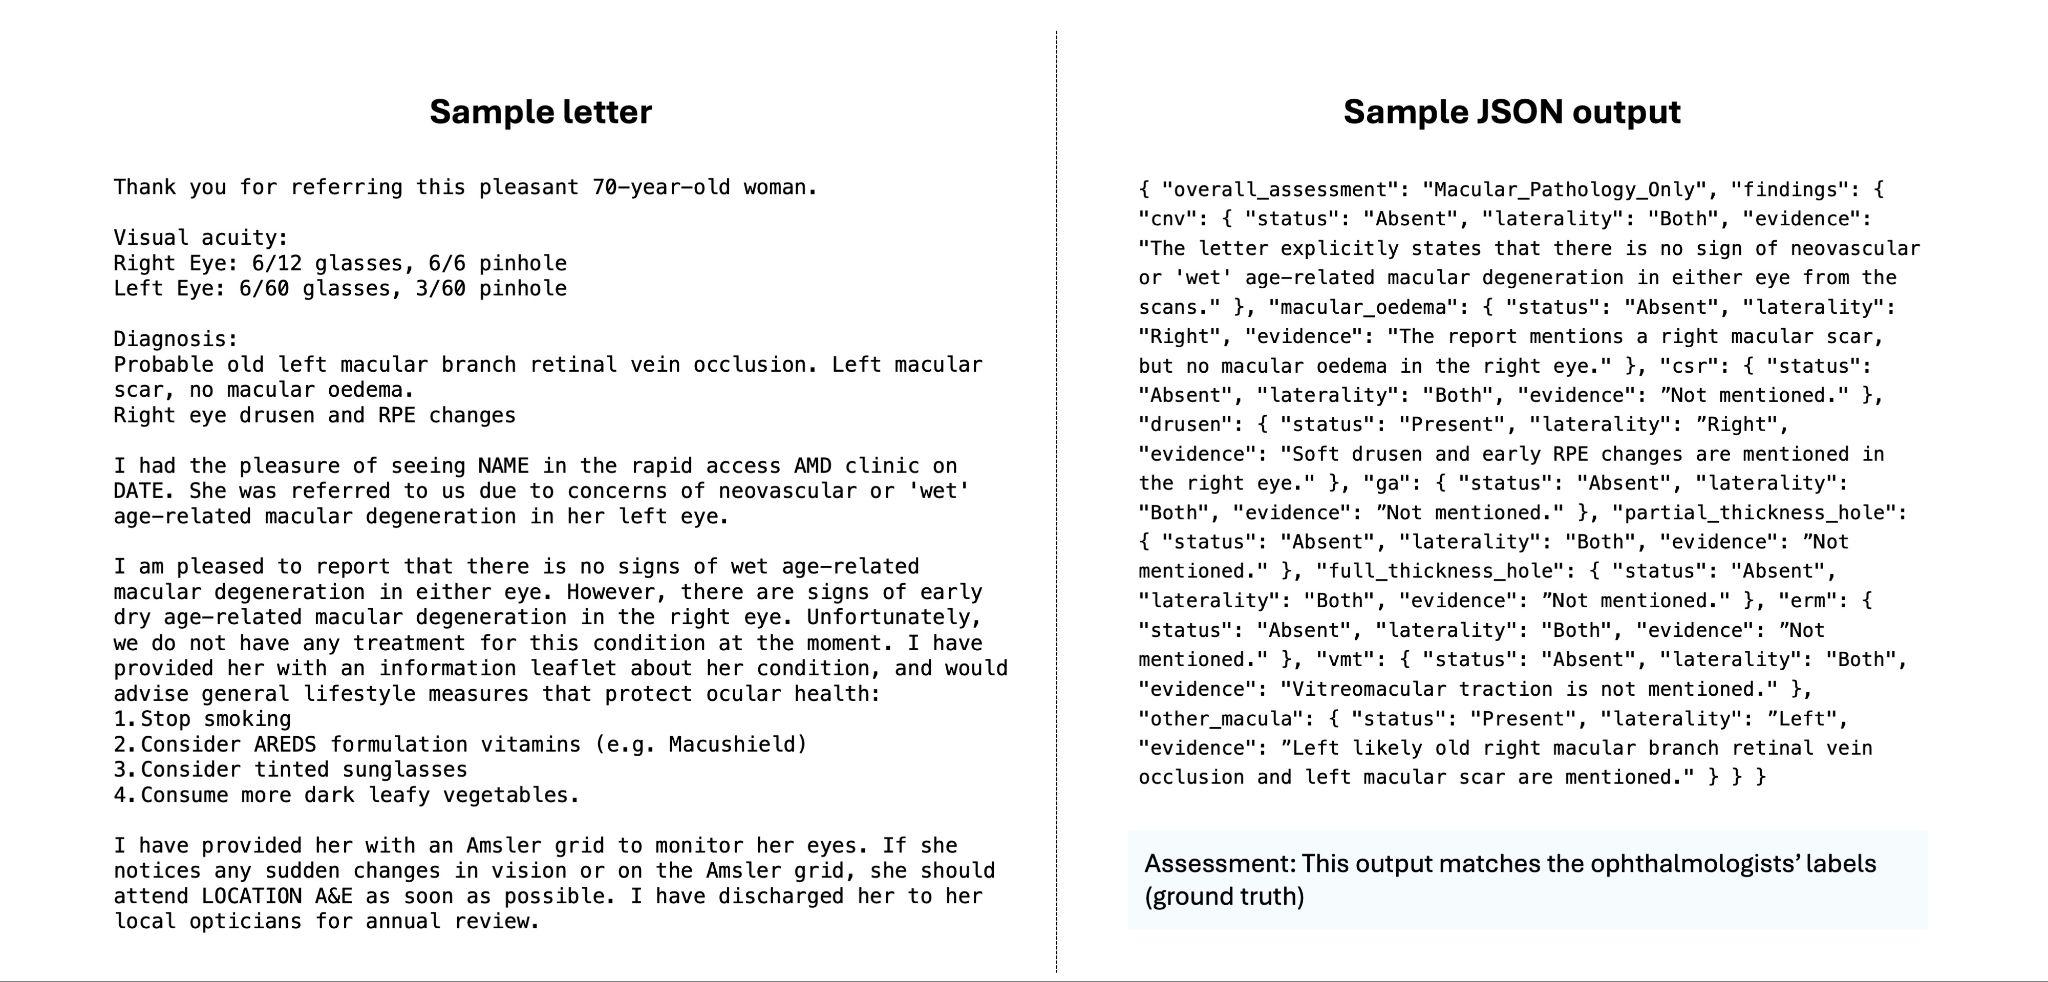
**

**Supplementary Figure 3: Line plots demonstrating the F1 scores by prompt for each Gemini model, with each subplot representing one of nine conditions.**


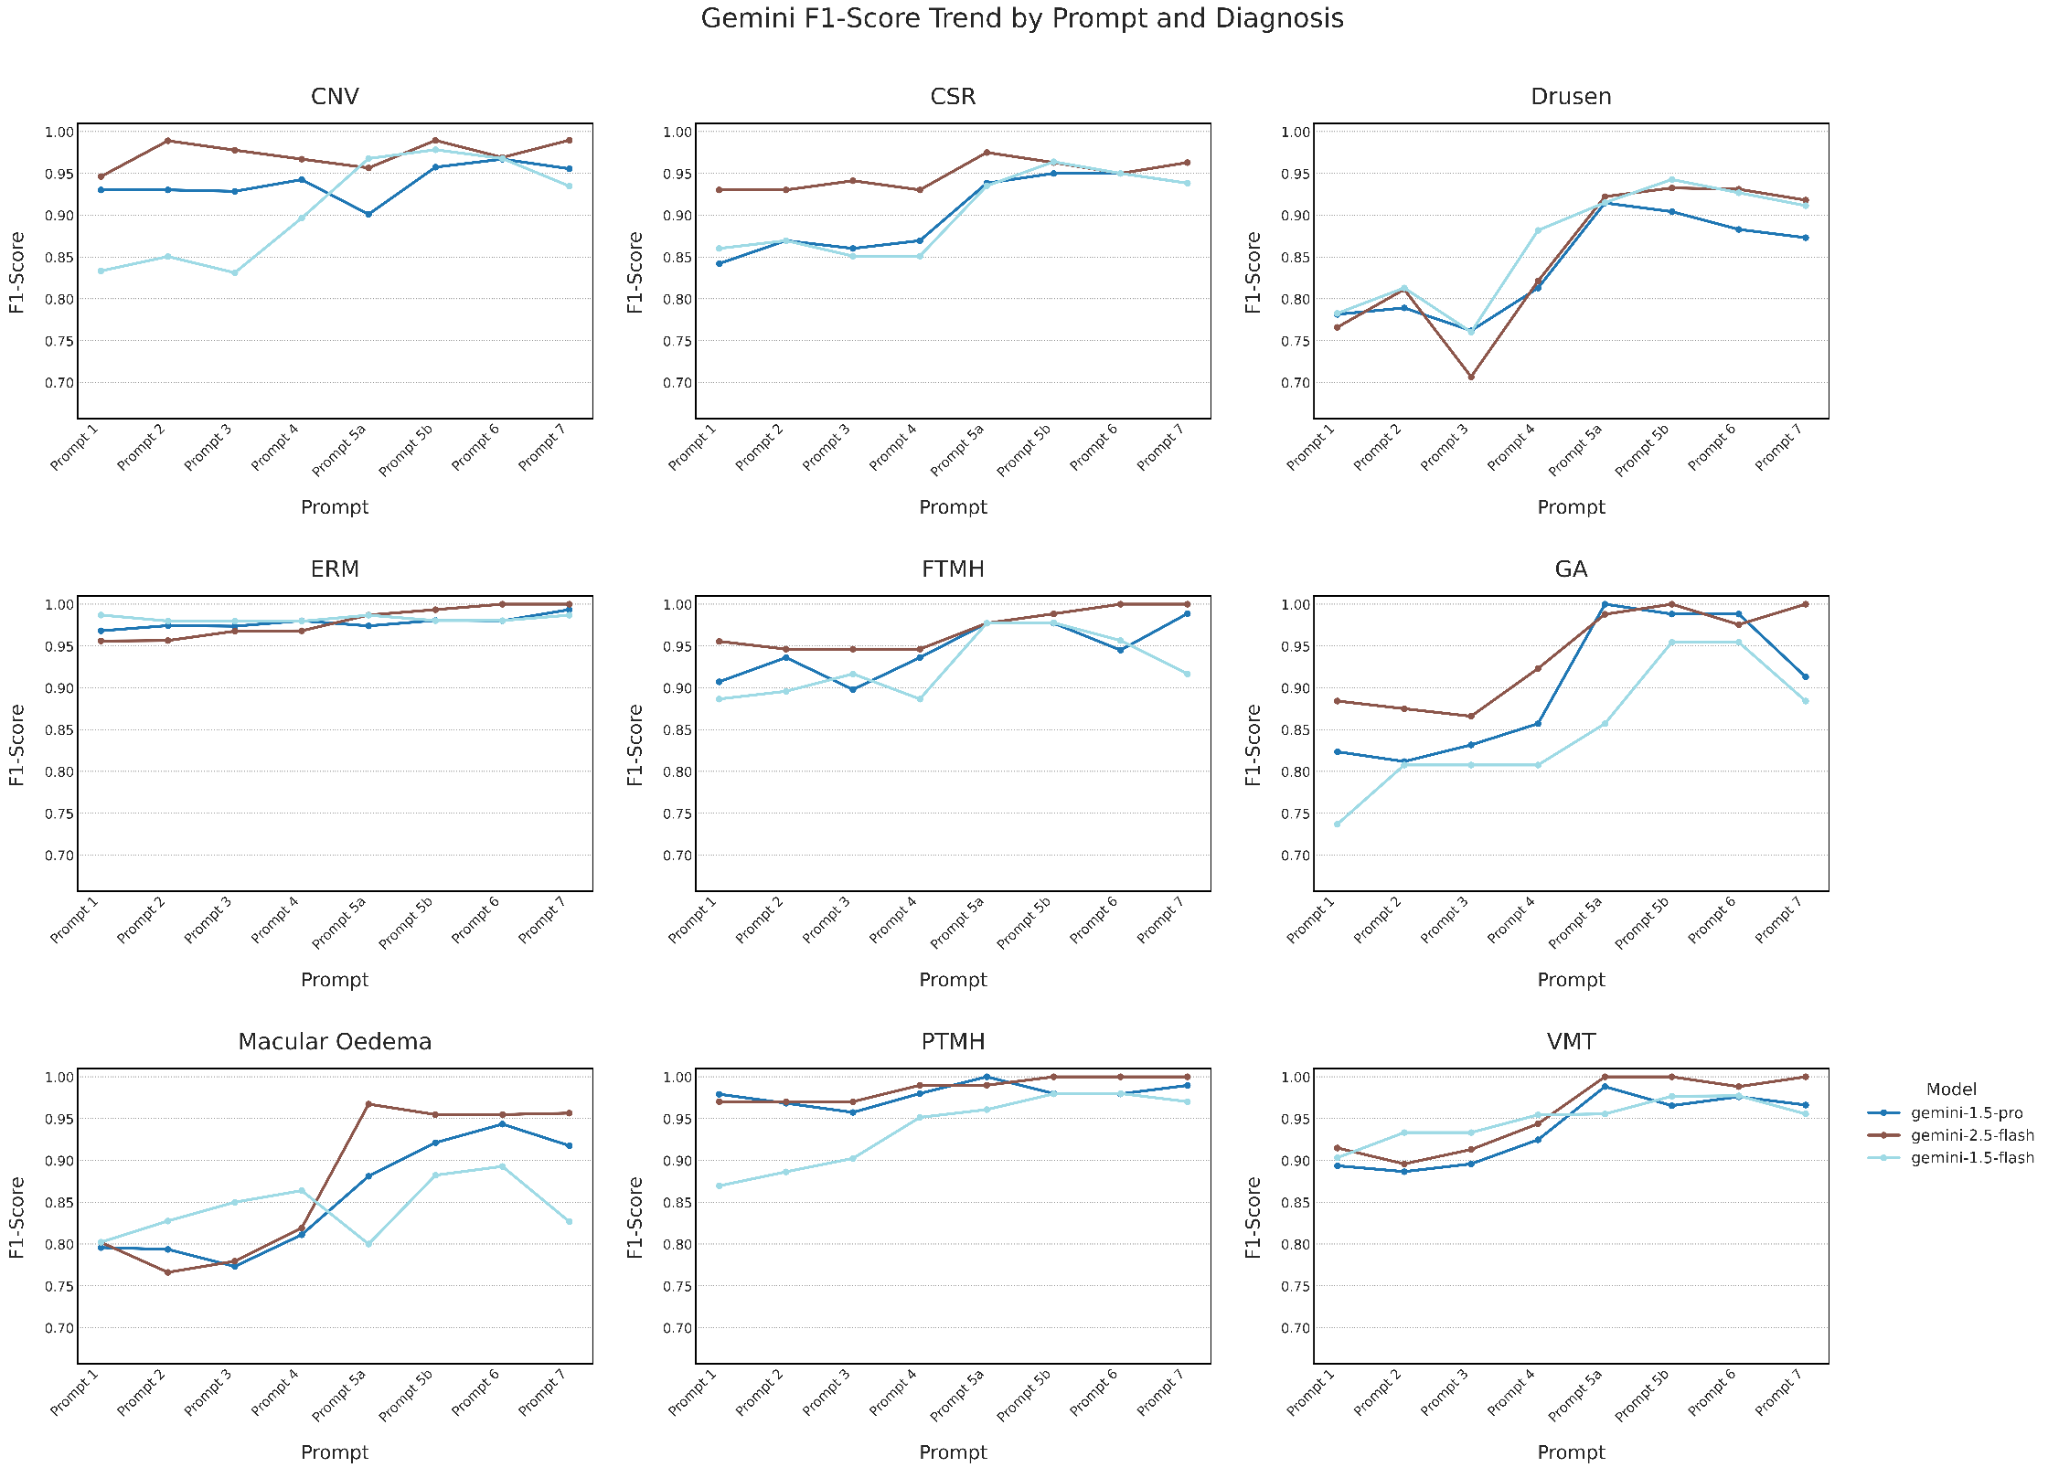


**Supplementary Figure 4: Line plots demonstrating the F1 scores by prompt for each model, with each subplot representing one of nine conditions, in addition to the micro- and macro-average F1 scores overall.**

**
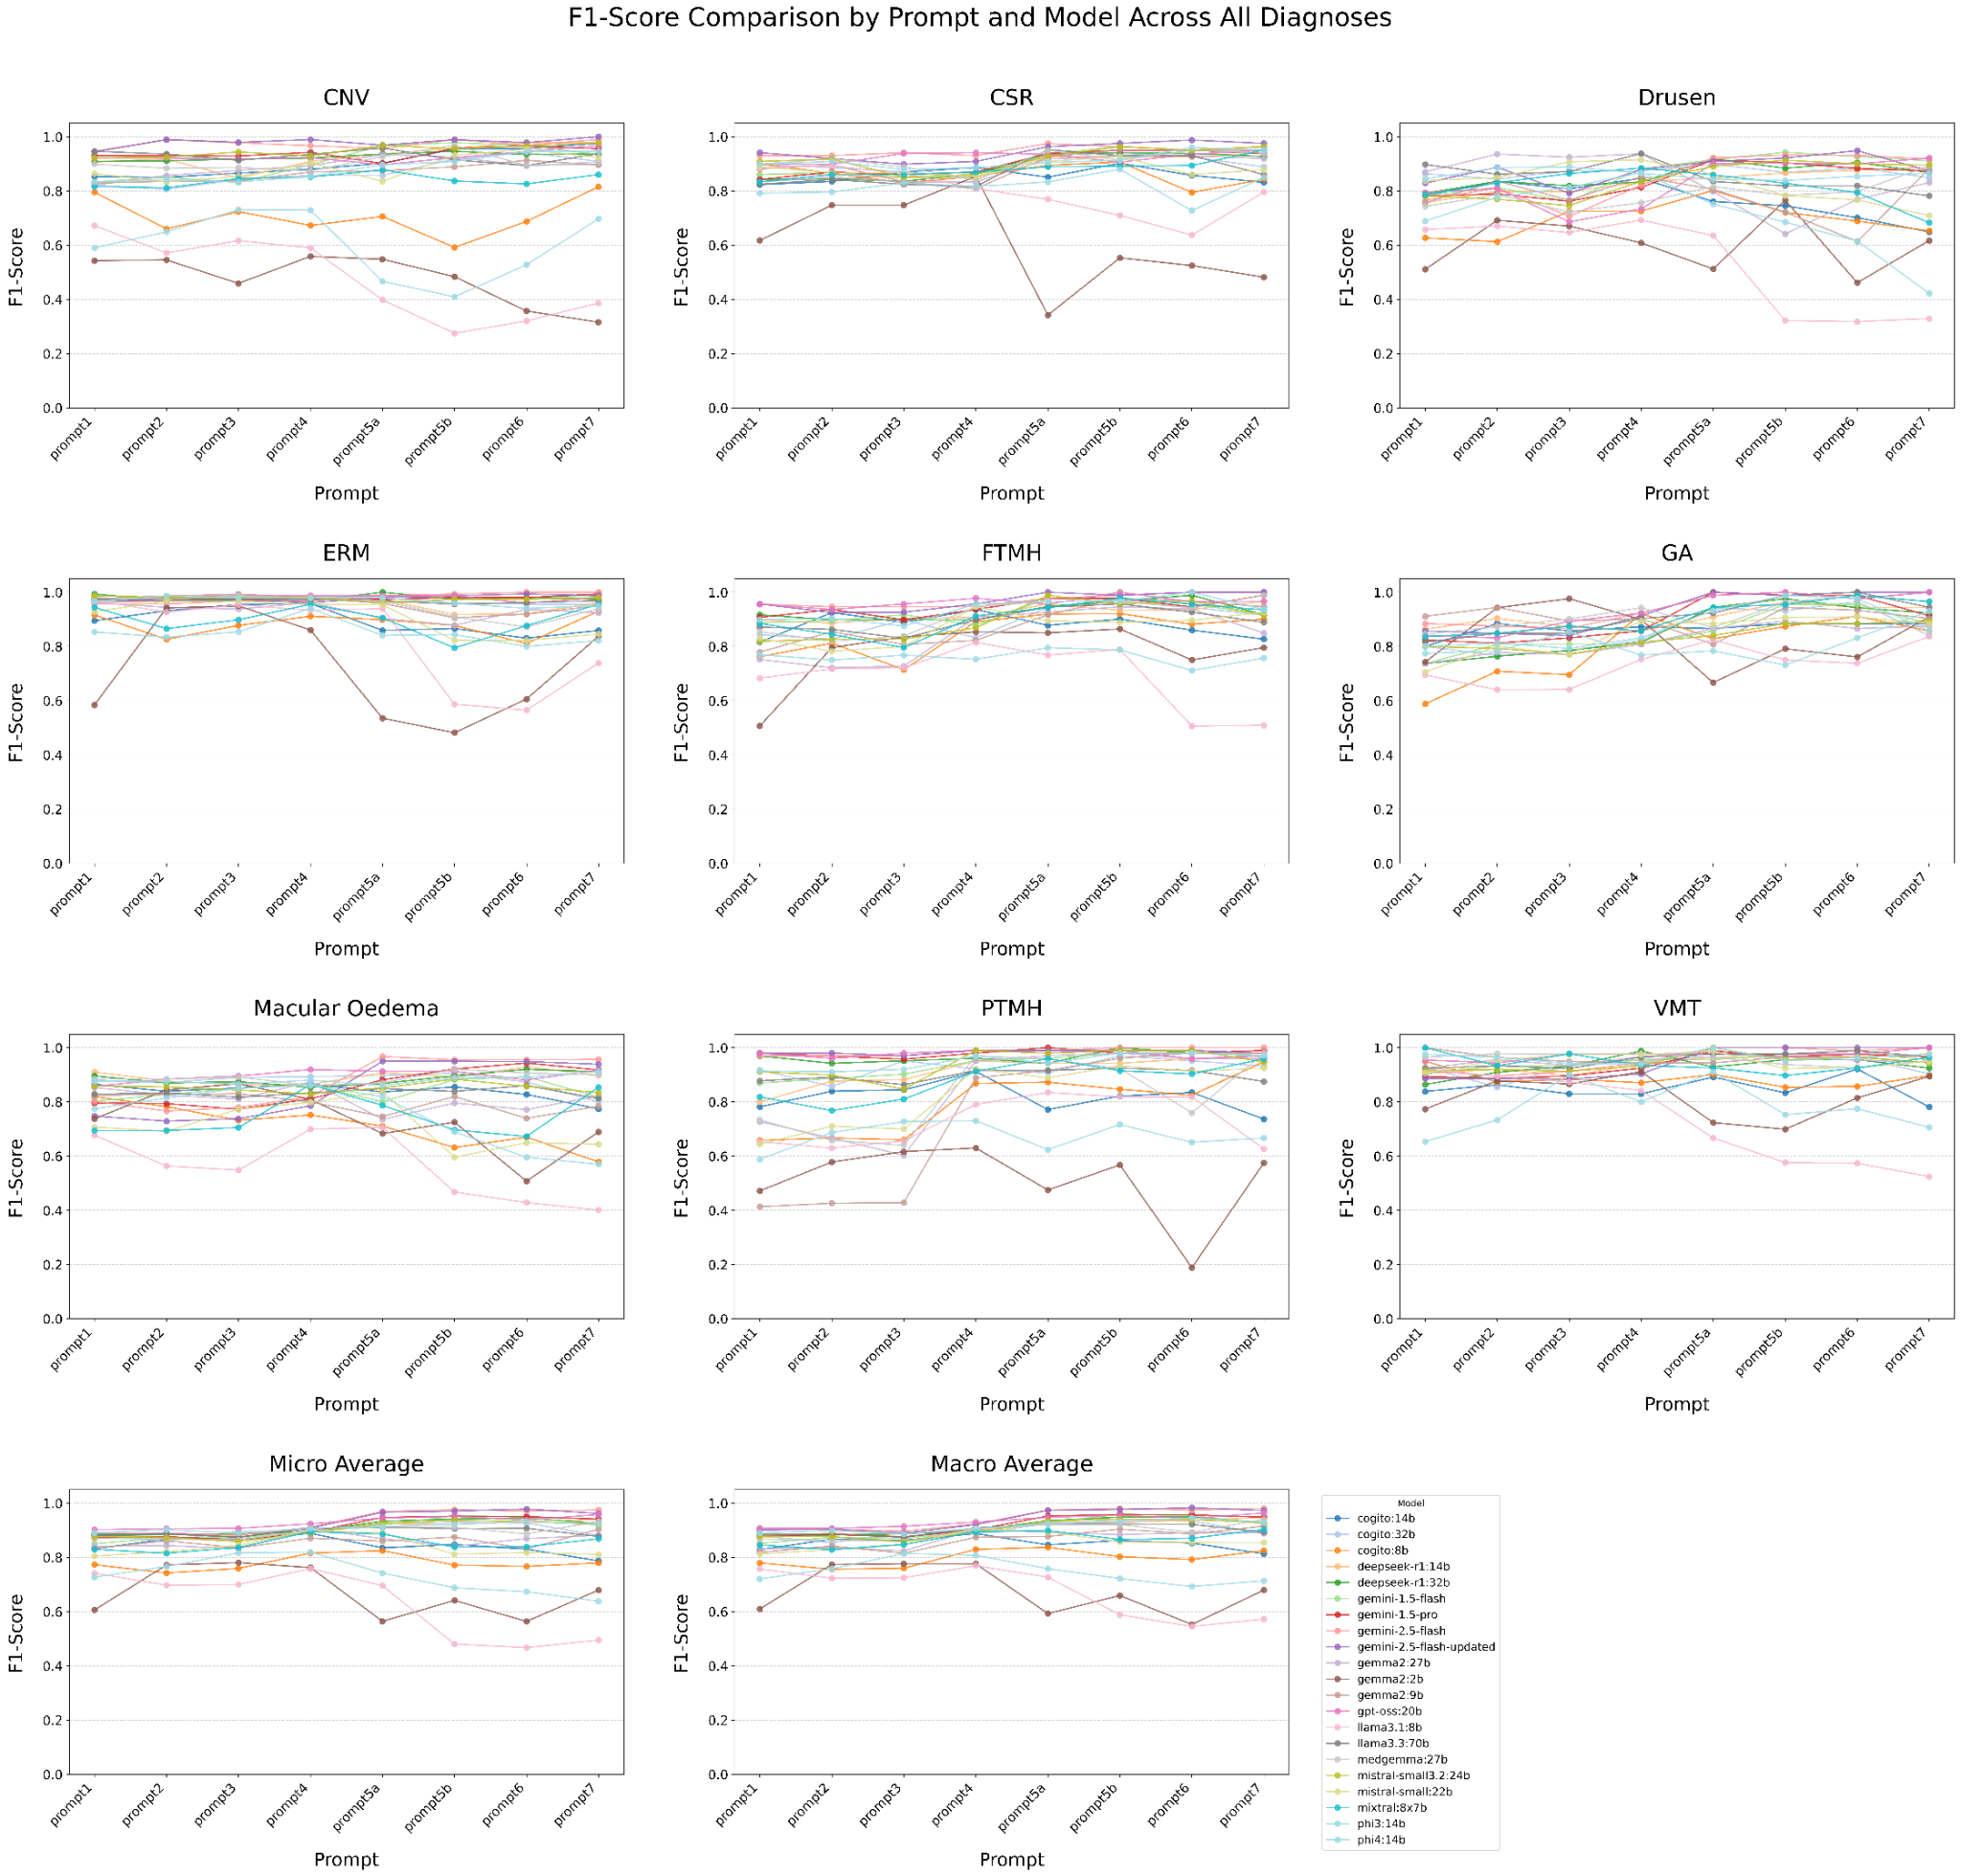
**

**Supplementary Figure 5: Pareto frontier analysis of LLM configurations across multiple LLM families and model sizes for the performance-cost trade-off (cost frontier), with each sub-figure representing one prompt from 1-7.** The Pareto frontiers for all models (black line) and for local models only (red dotted line) are presented.

**
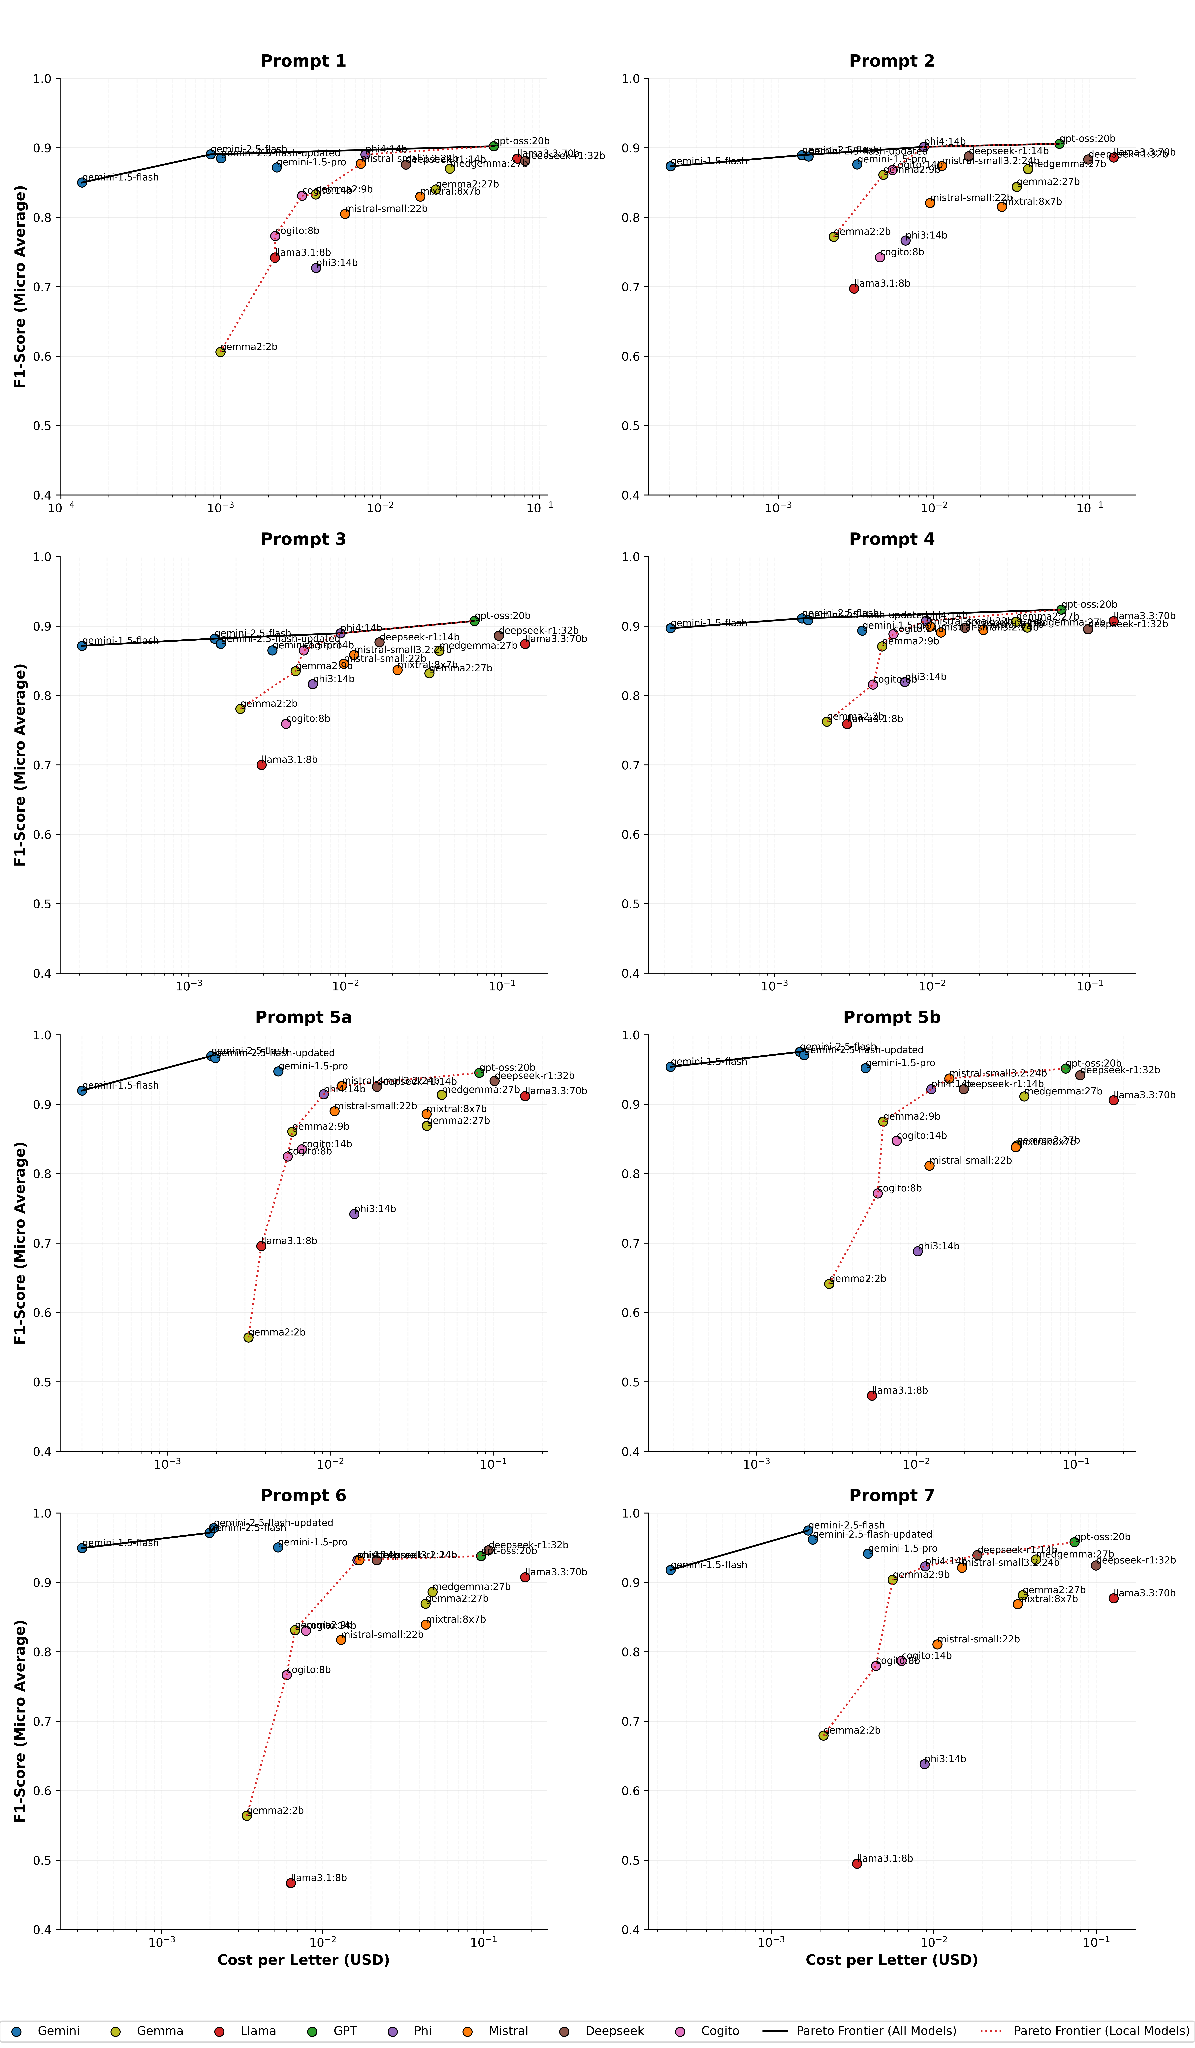
**

**
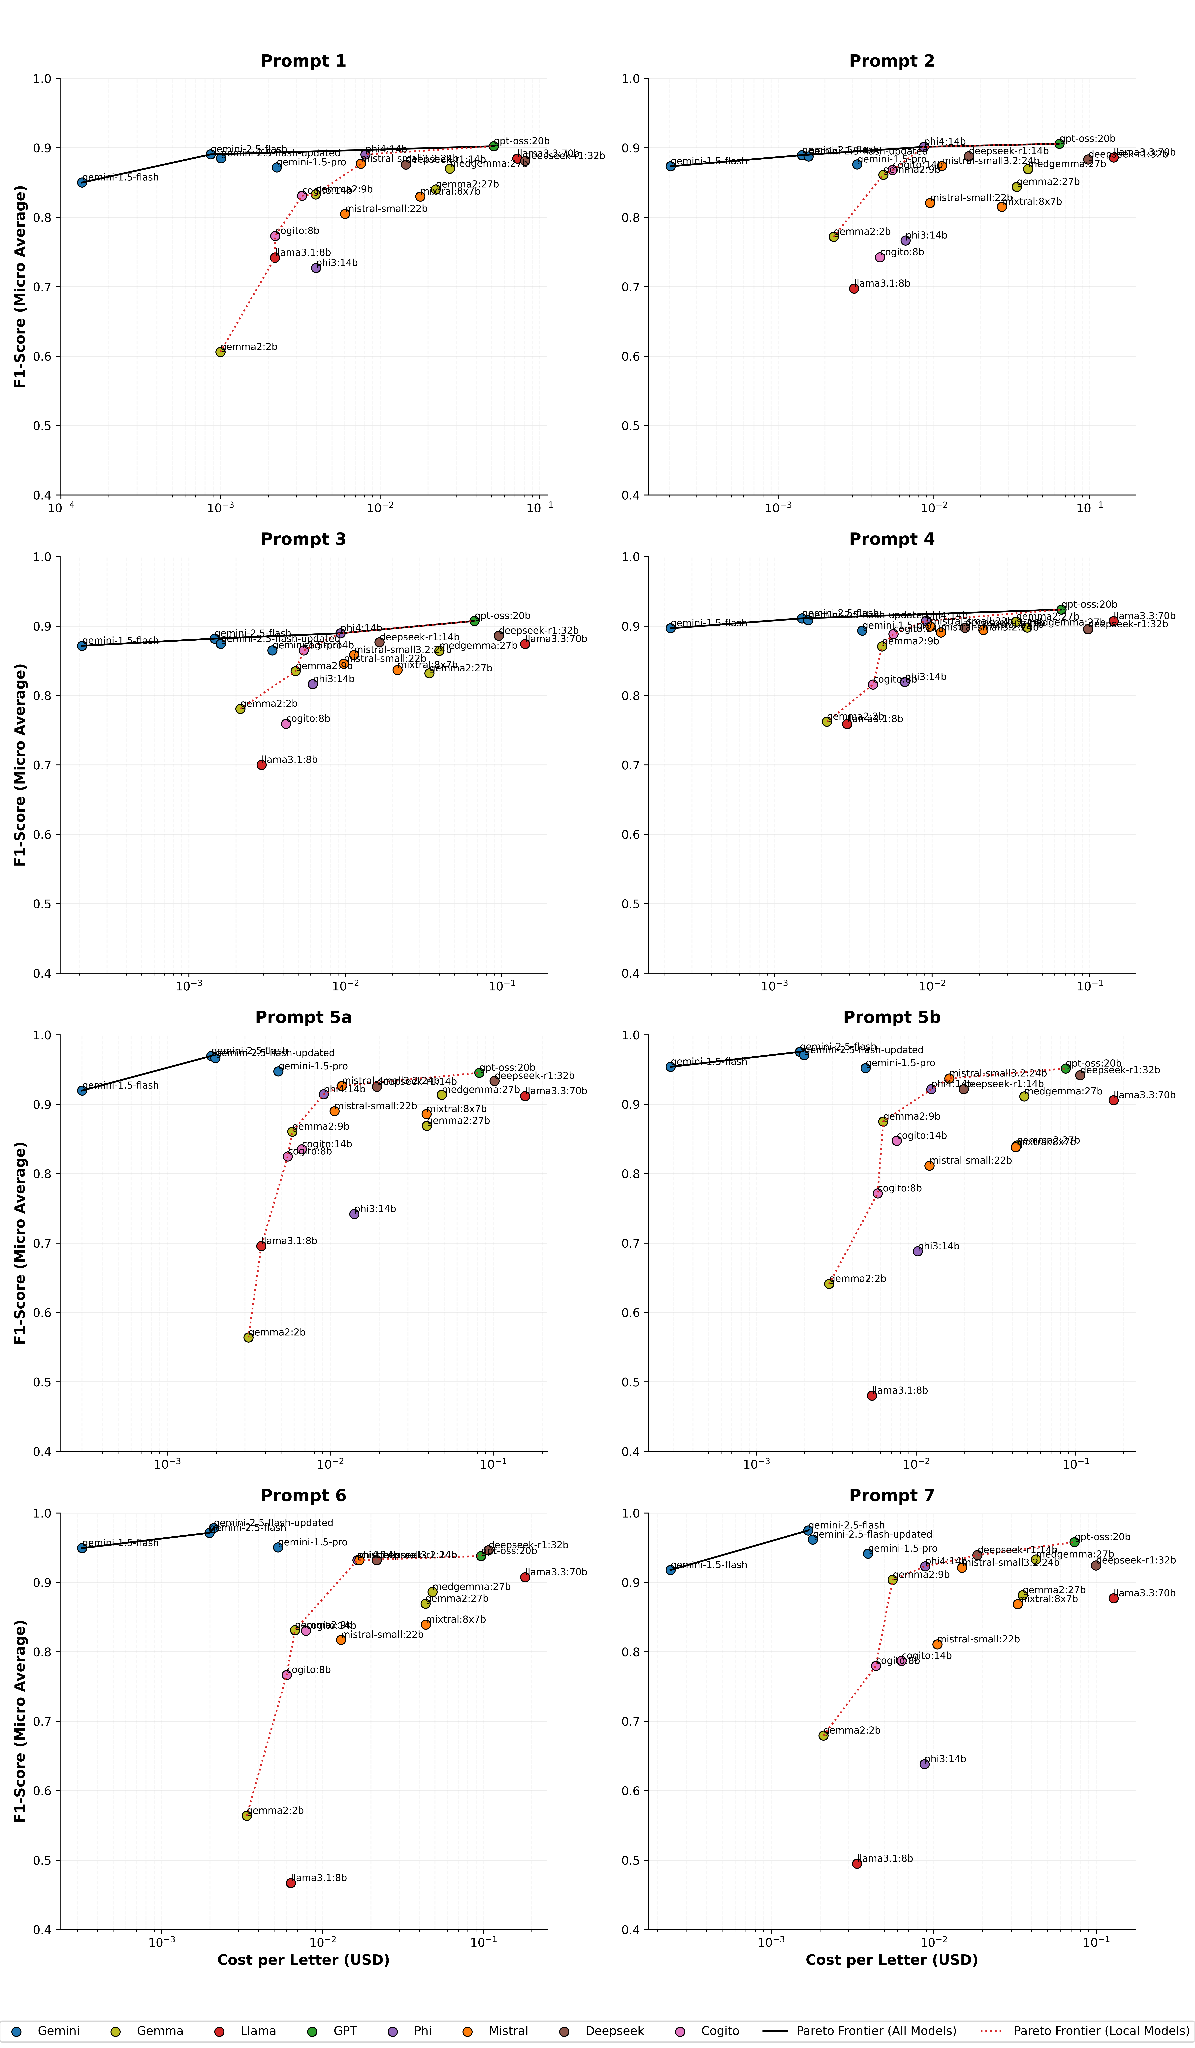
**

**Supplementary Figure 6: Pareto frontier analysis of LLM configurations across multiple LLM families and model sizes for the performance-time trade-off (latency frontier), with each sub-figure representing one prompt from 1-7**.The Pareto frontiers for all models (black line) and for local models only (red dotted line) are presented.

**
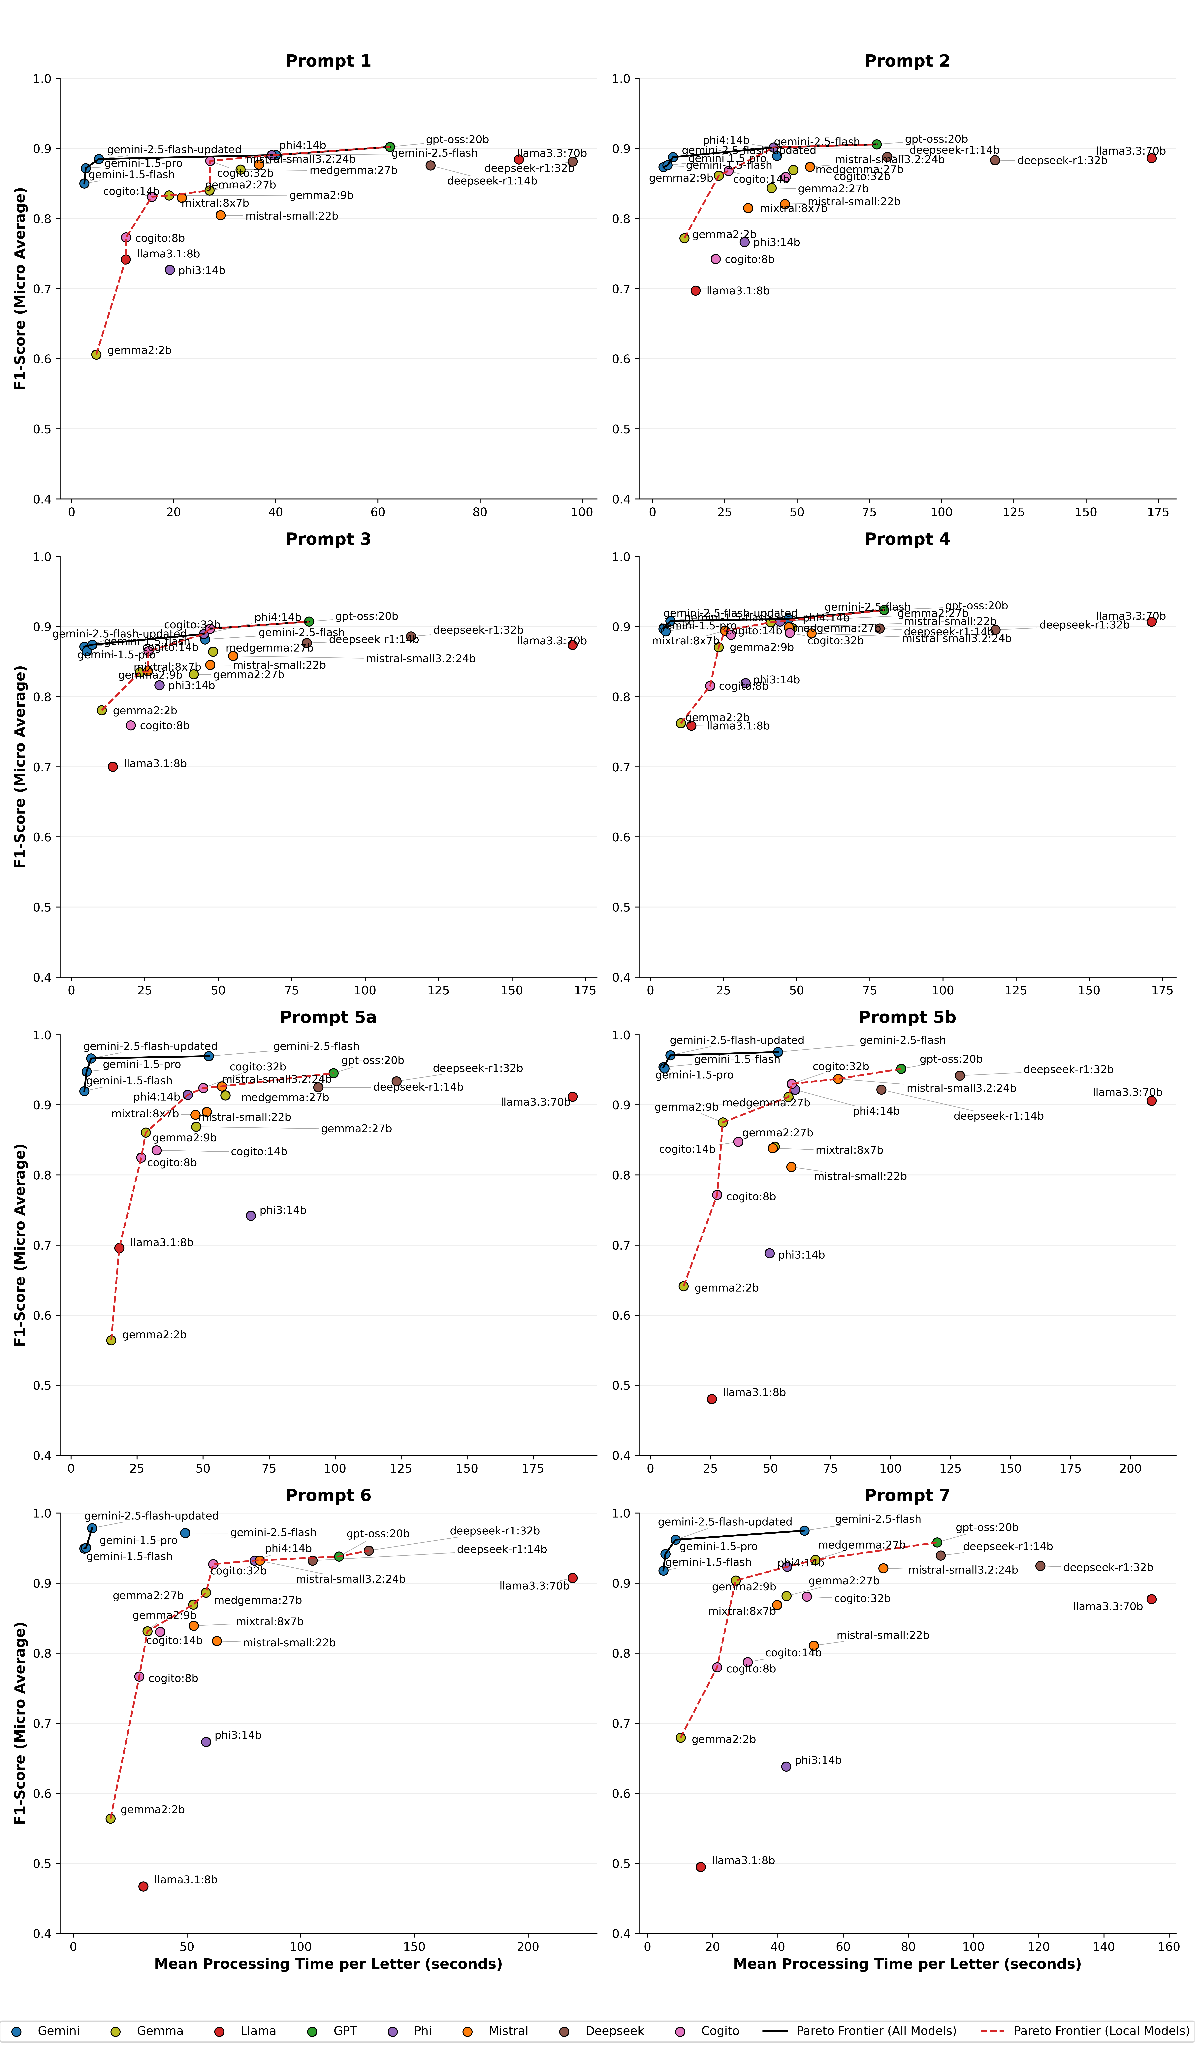
**

**
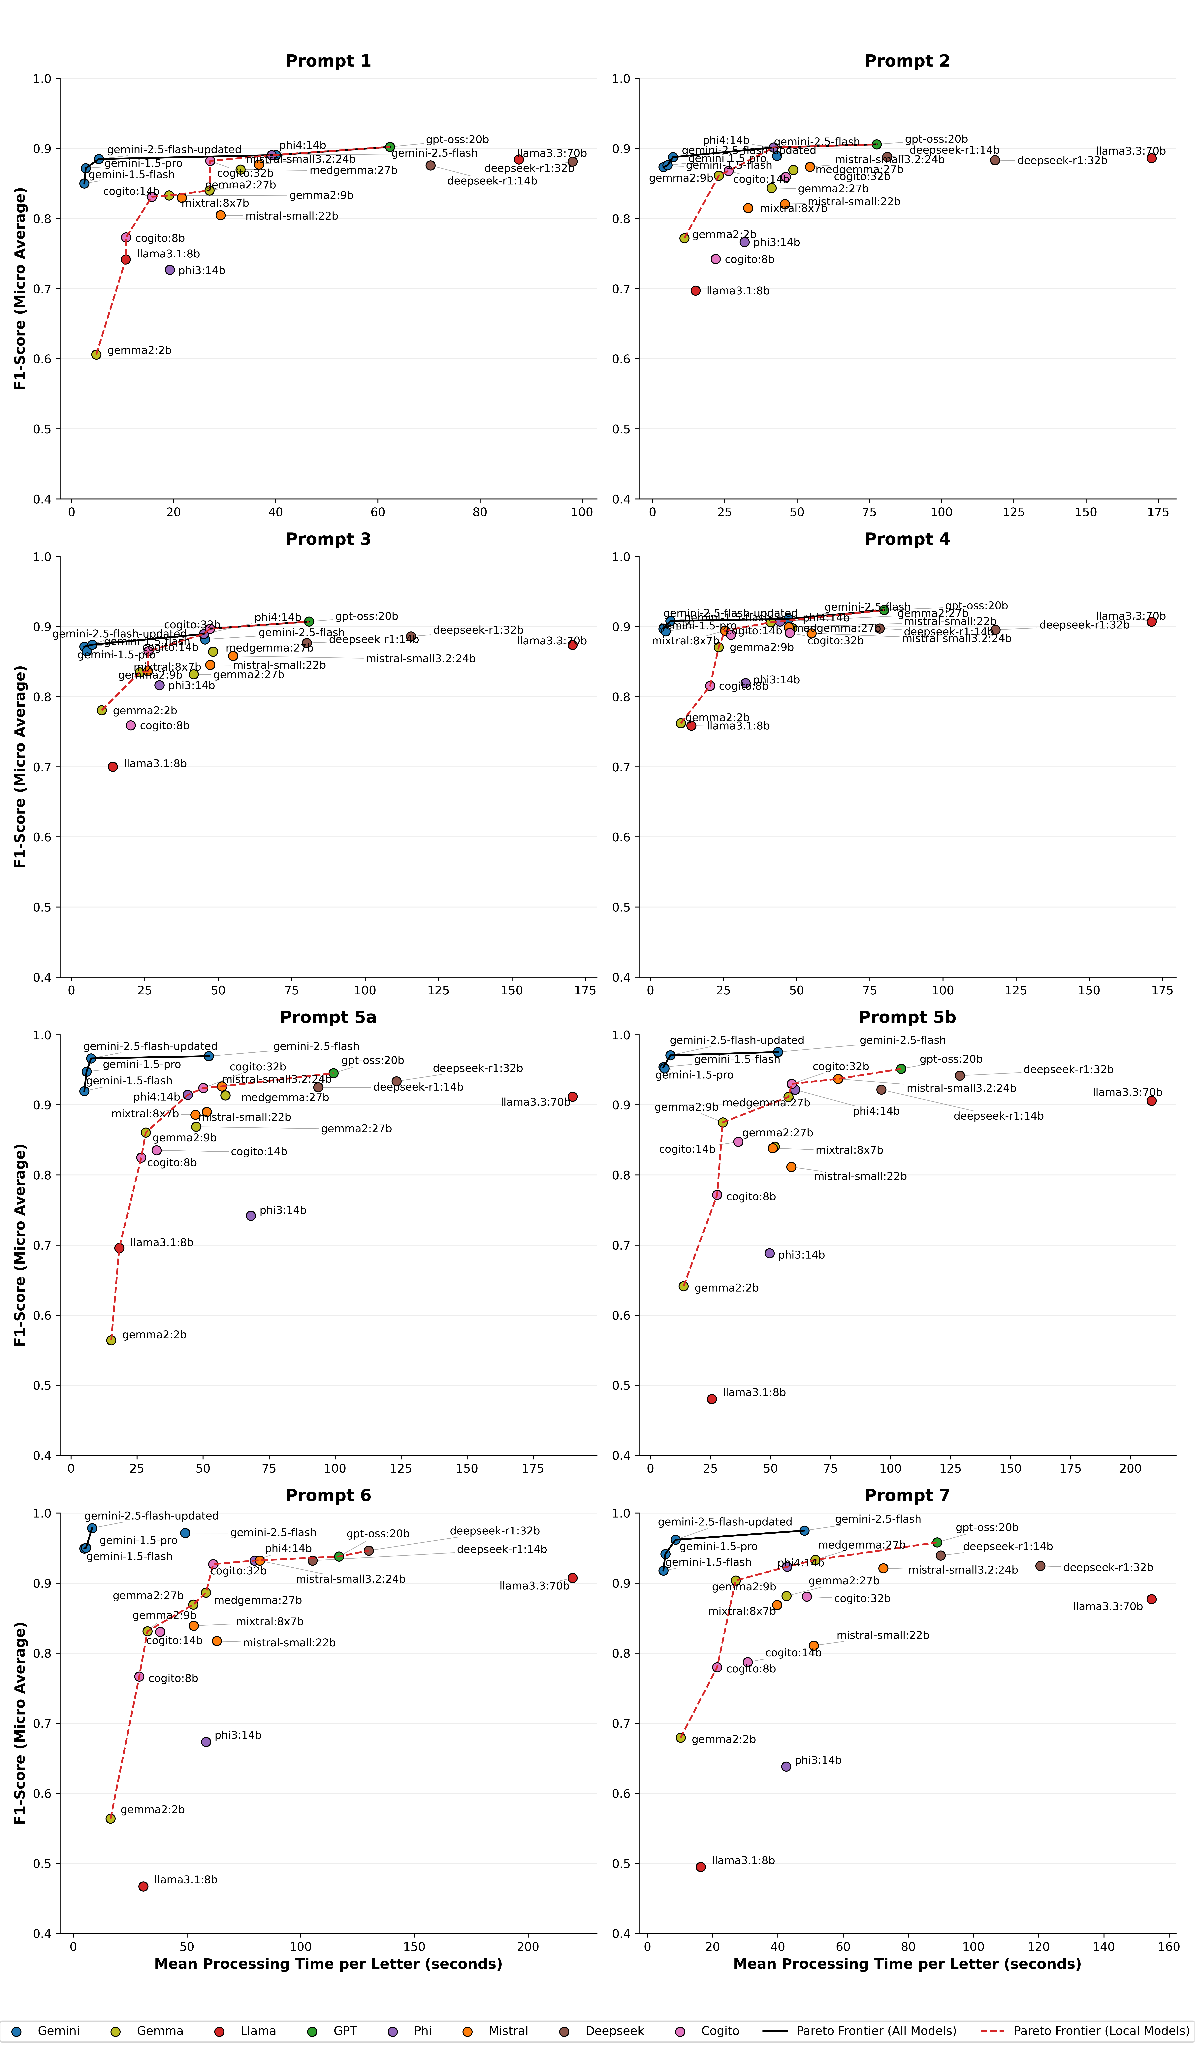
**

**Supplementary Figure 7: Bubble chart depicting the cost and time trade-offs across multiple LLM families and model size, with performance represented by the bubble size. Each sub-figure represents one prompt from 1-7.** The axes are plotted on a log-log scale to better show the orders of magnitude difference in resource consumption. Highly efficient models are positioned in the lower left corner of the chart (low cost and low time) and are represented by the largest bubbles (high F1 score).


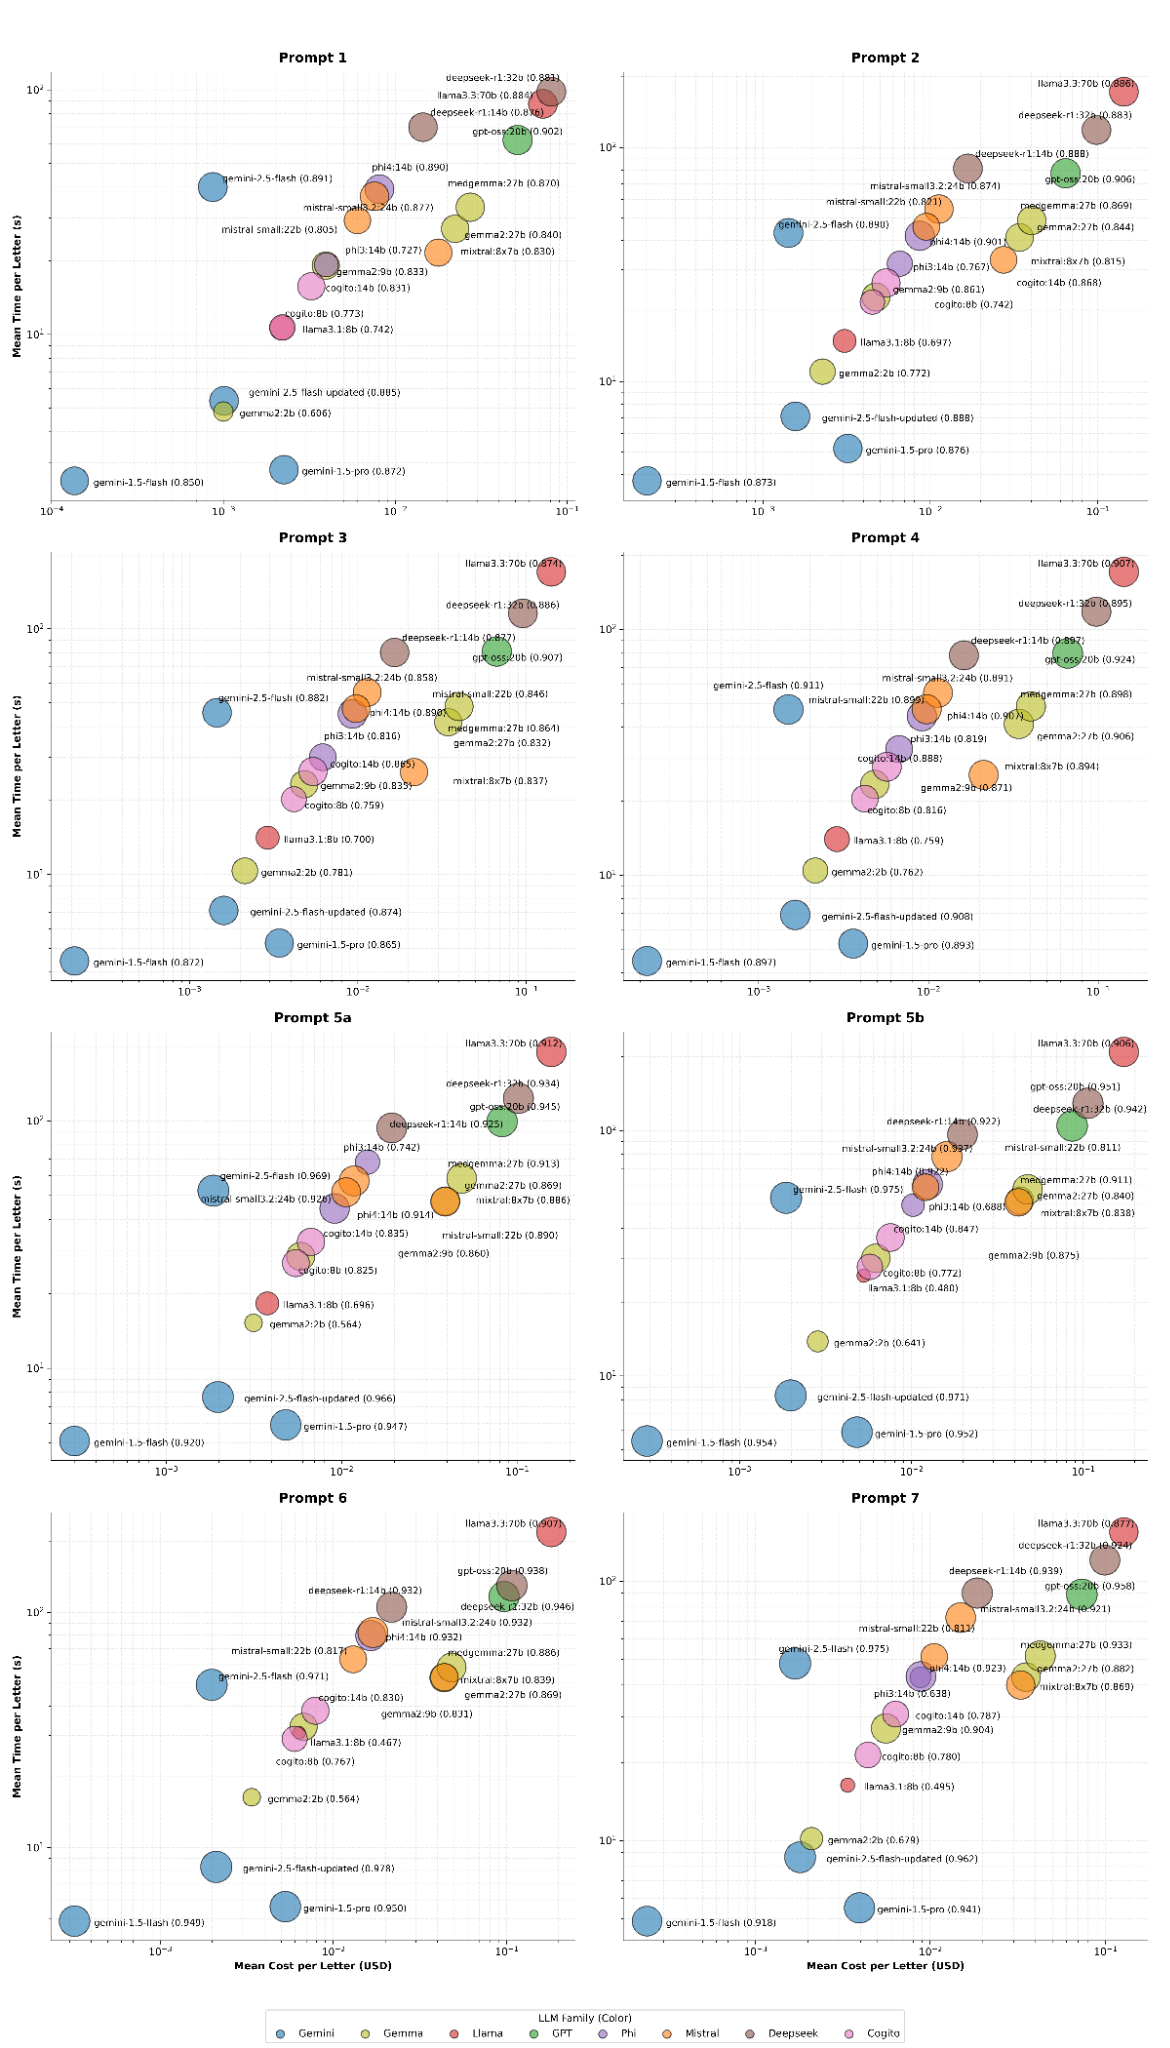


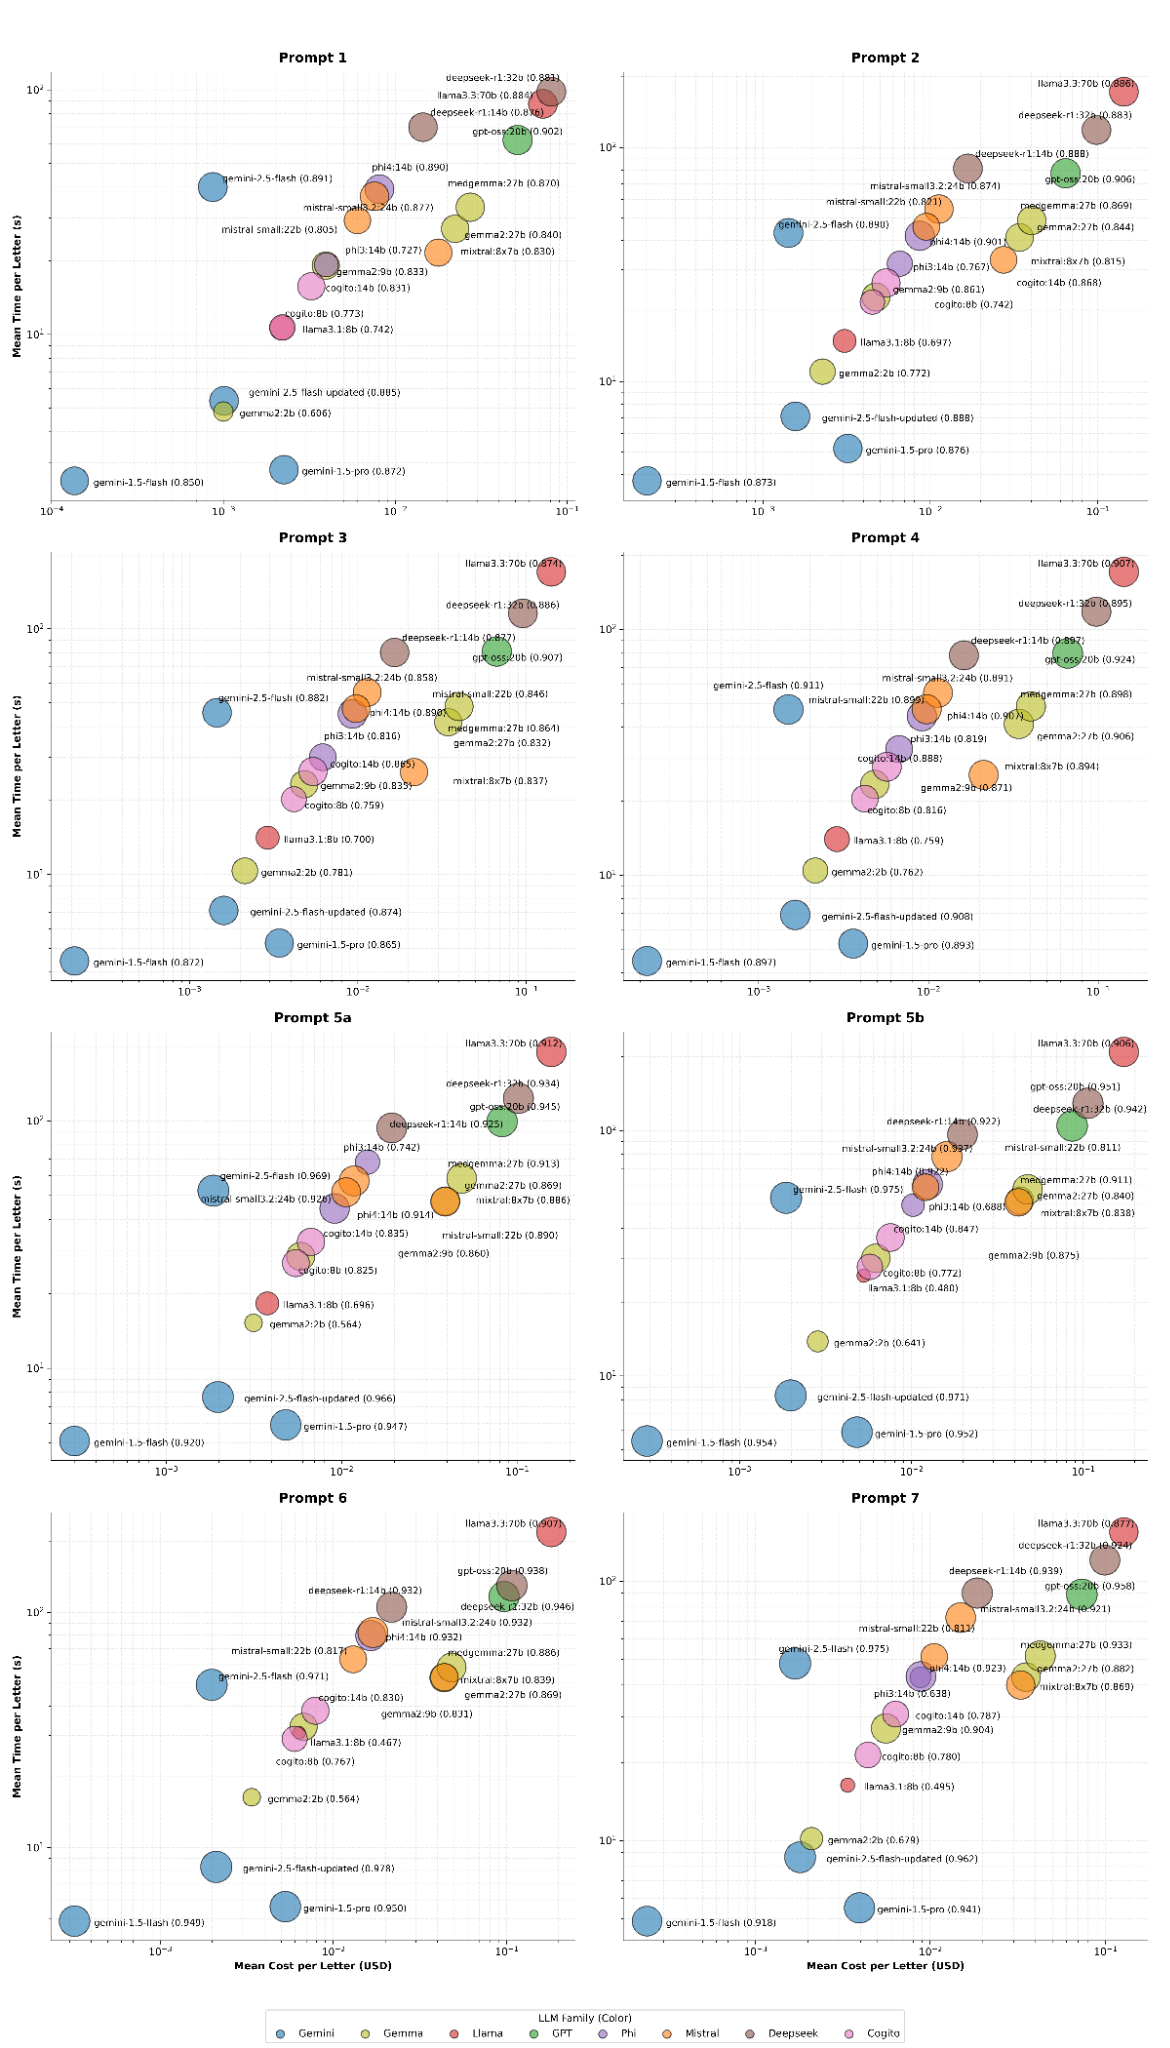


**Supplementary Figure 8: Confusion matrix comparing the error taxonomy theme assignments between the LLM judge’s prediction and the human grader's ground truth. The numbers indicate the count of observations in each category.** This achieved a Cohen’s κ of 0.909, indicating substantial agreement.


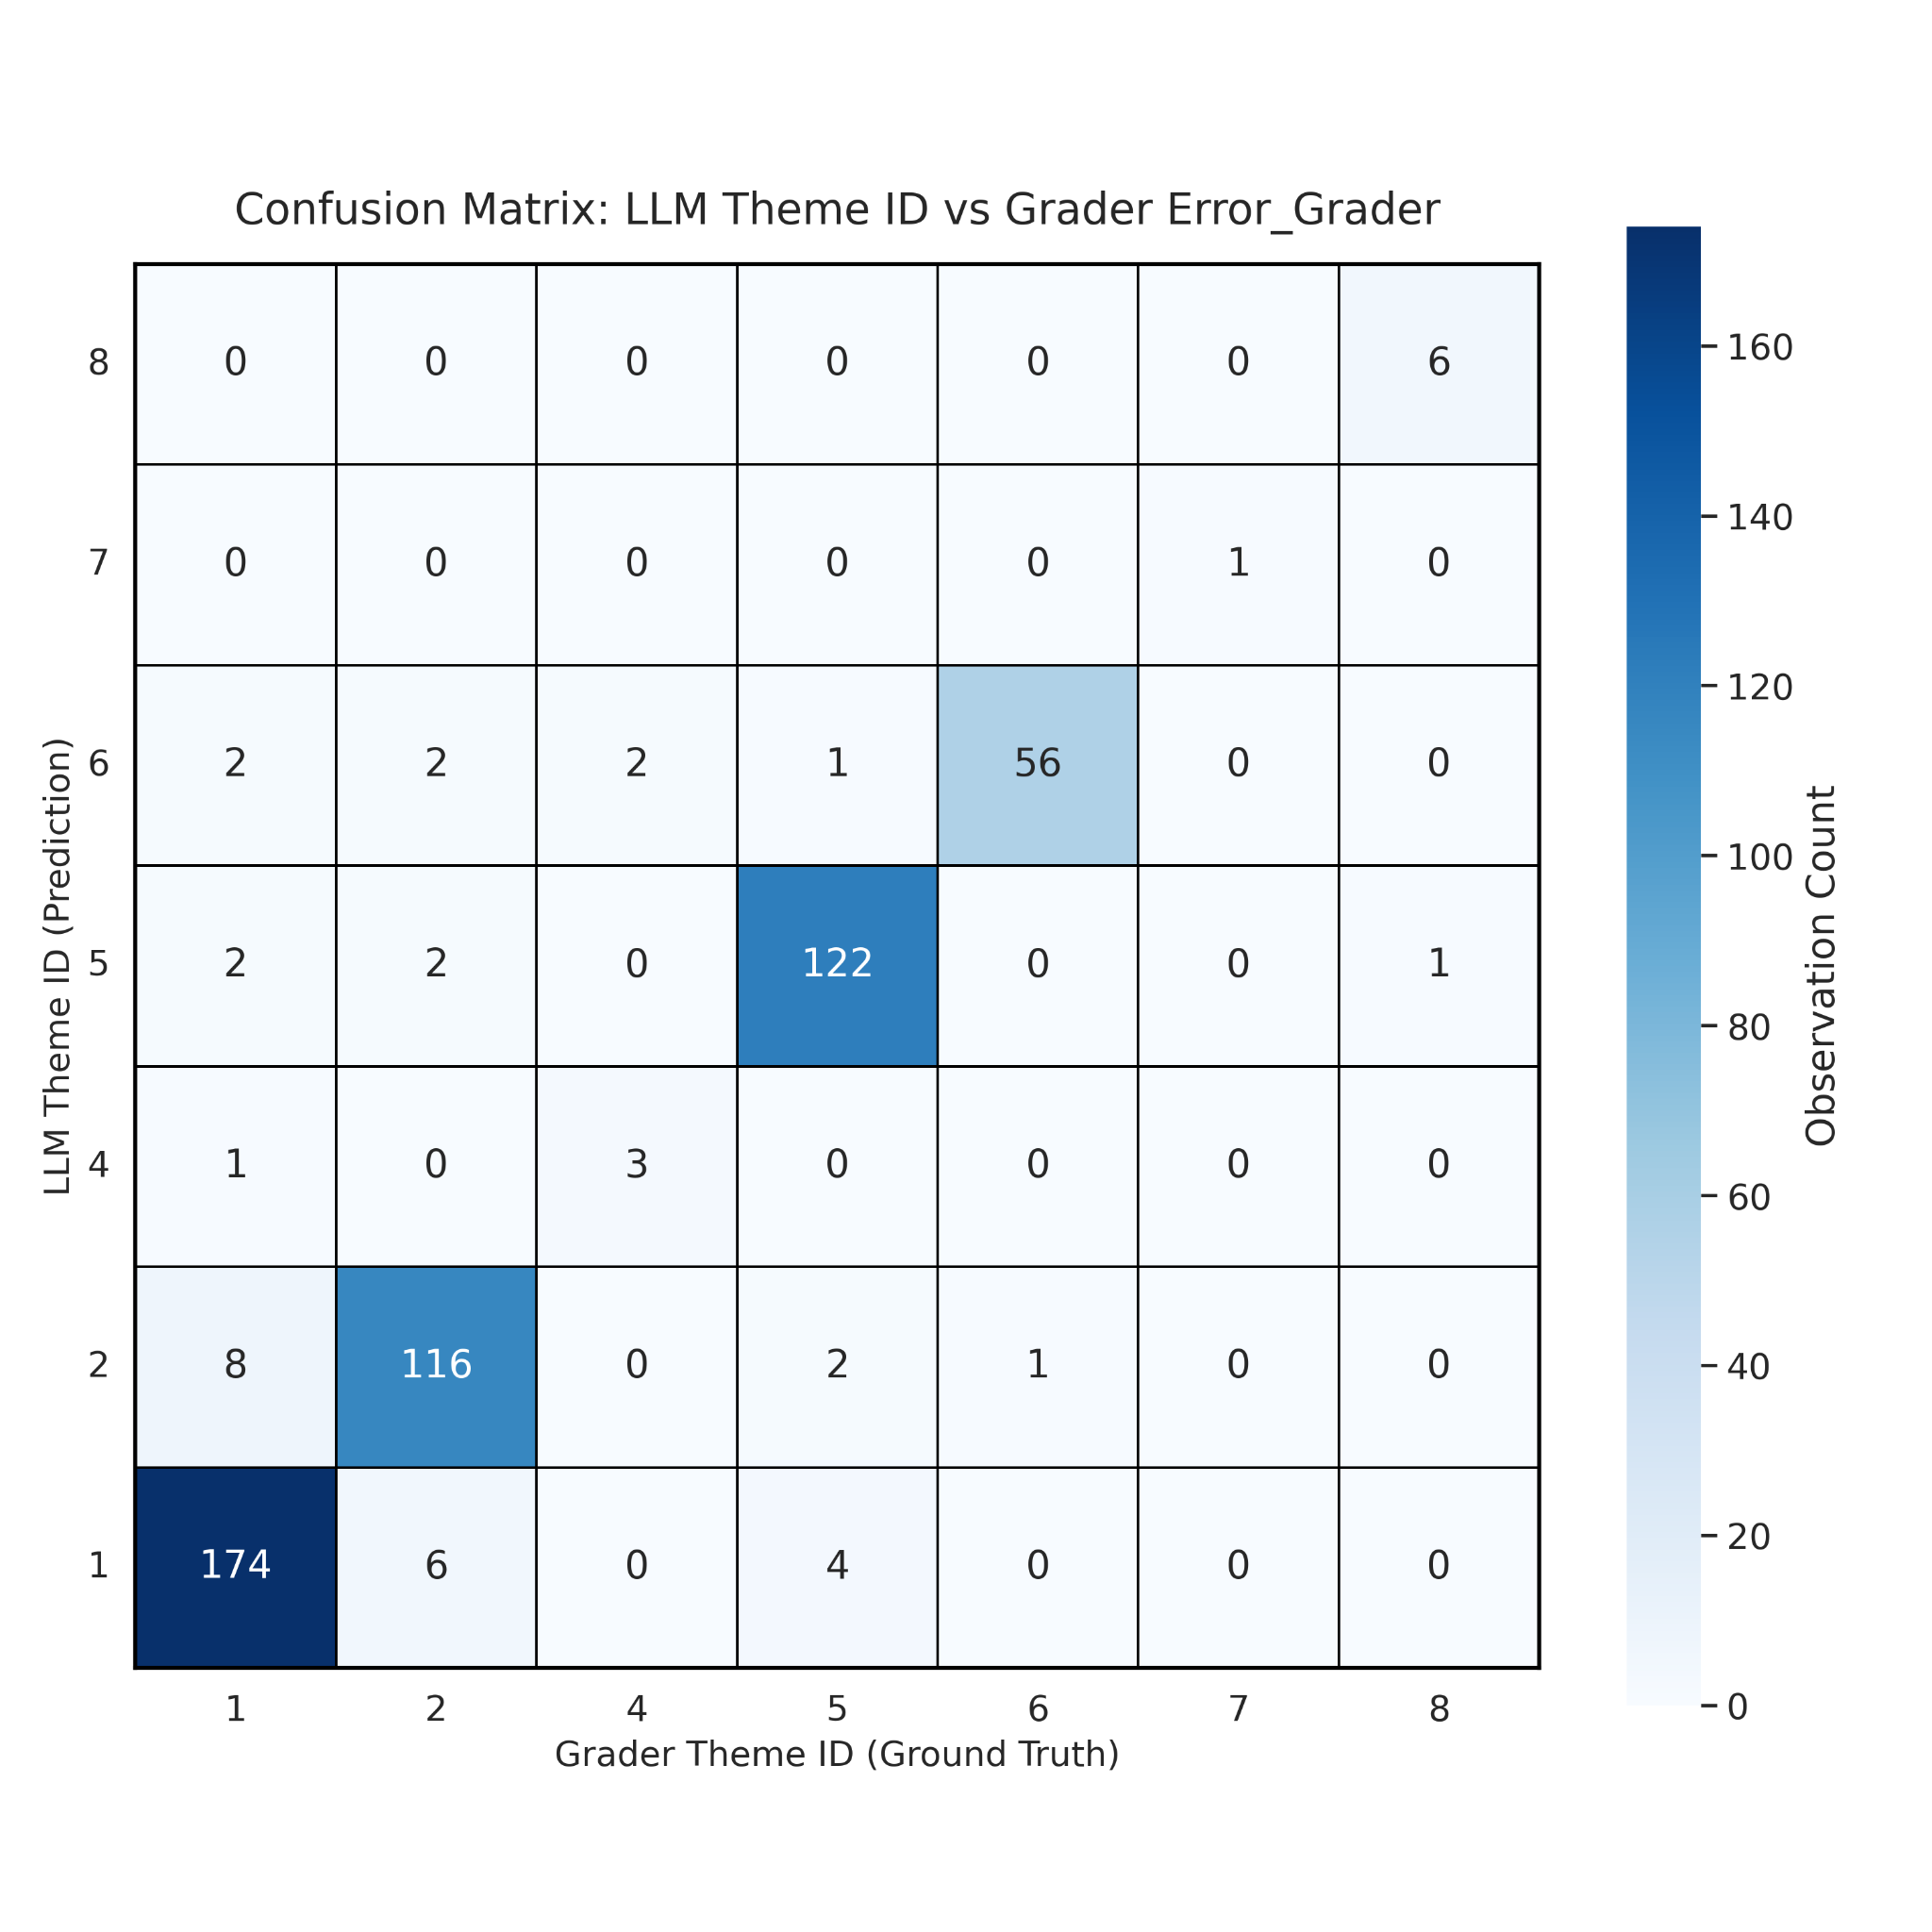


**Supplementary Figure 9: Distribution of error themes by model and prompt.** The stacked bars are coloured according to the specific error category, allowing for a side-by-side comparison of the frequency of each error type across different model and prompt combinations.

**
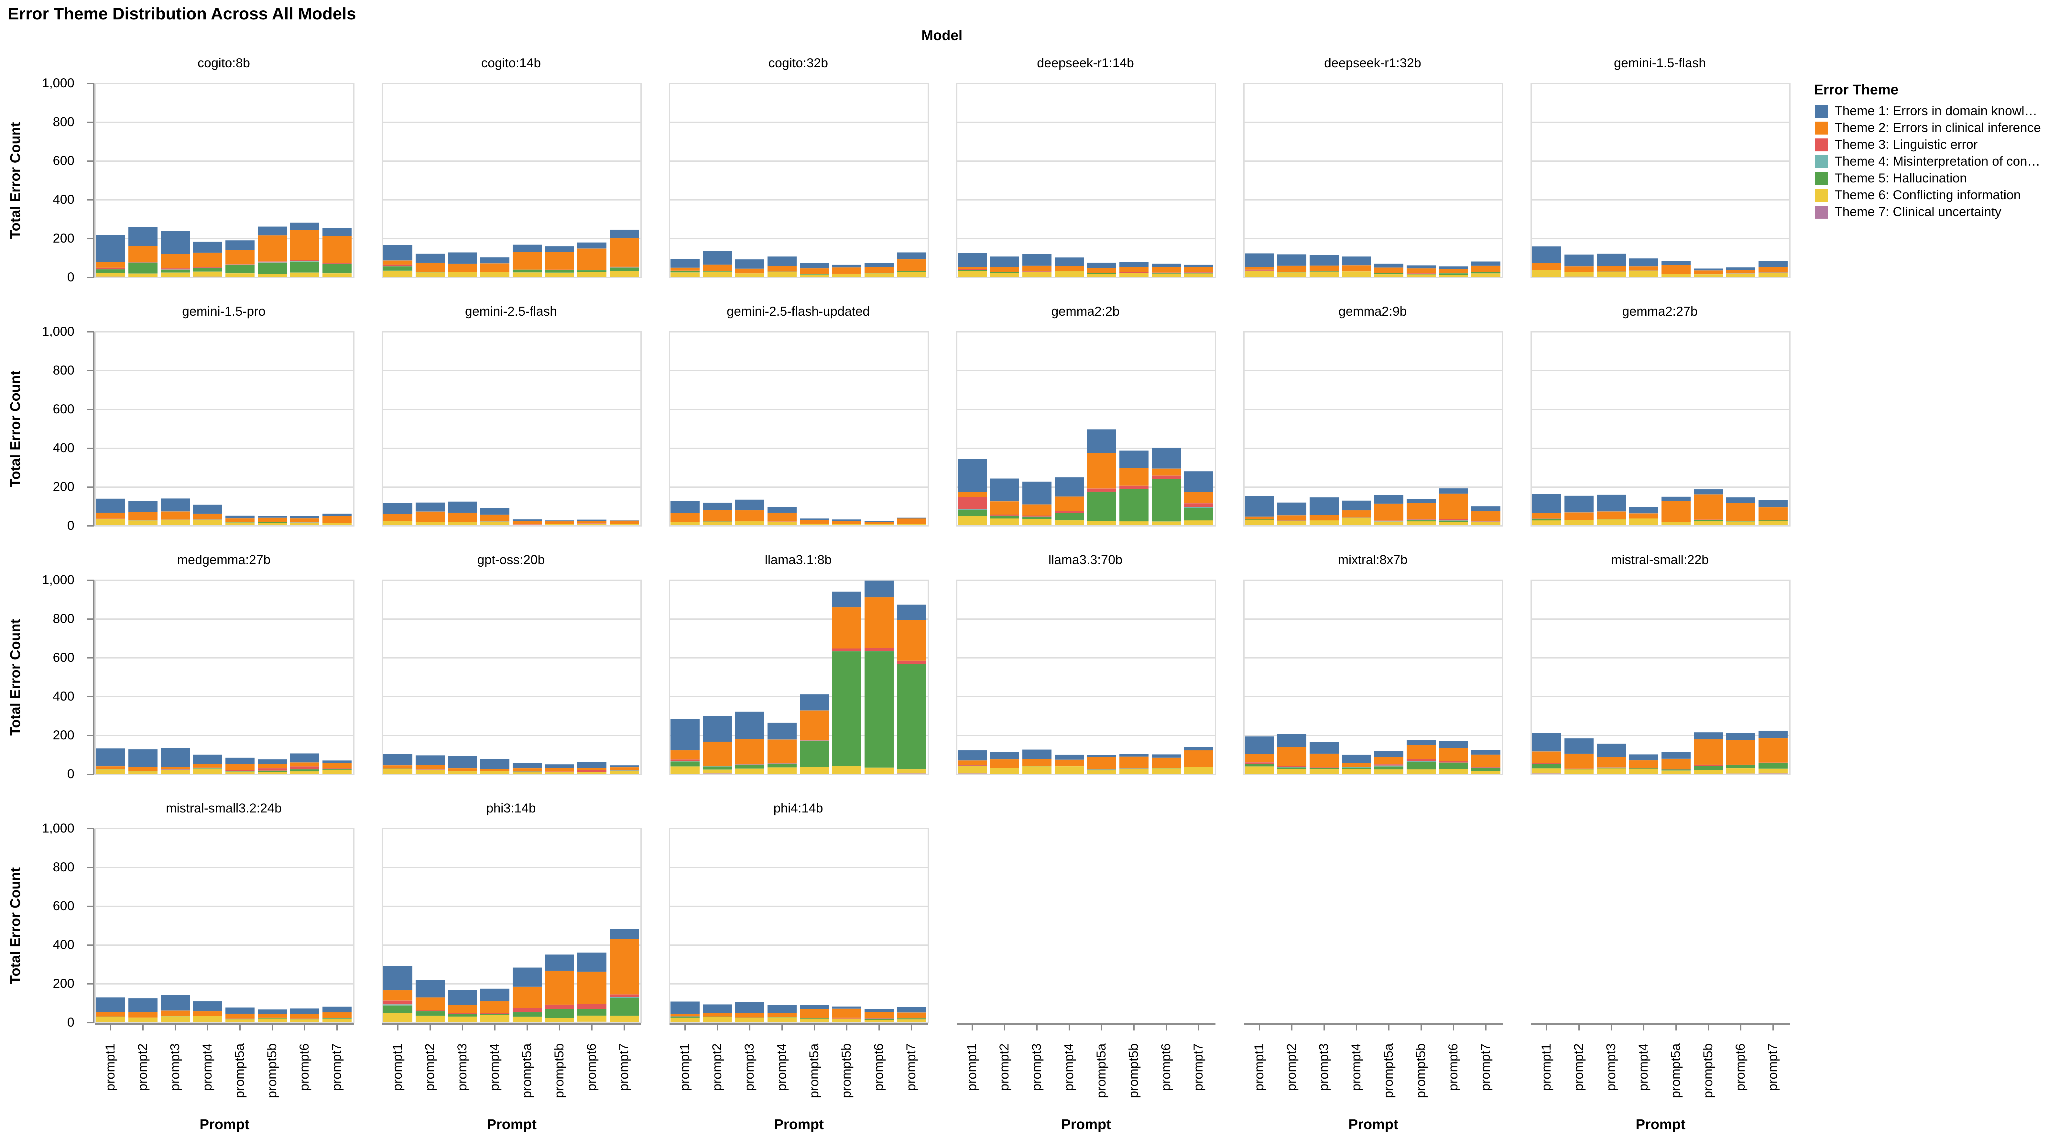
**

**Supplementary Figure 10: Normalised distribution of error themes by model and prompt, displaying the proportion of error categories for each prompt.** The stacked bars are coloured according to the specific error category, allowing for a side-by-side comparison of the relative frequency of each error type across different model and prompt combinations.


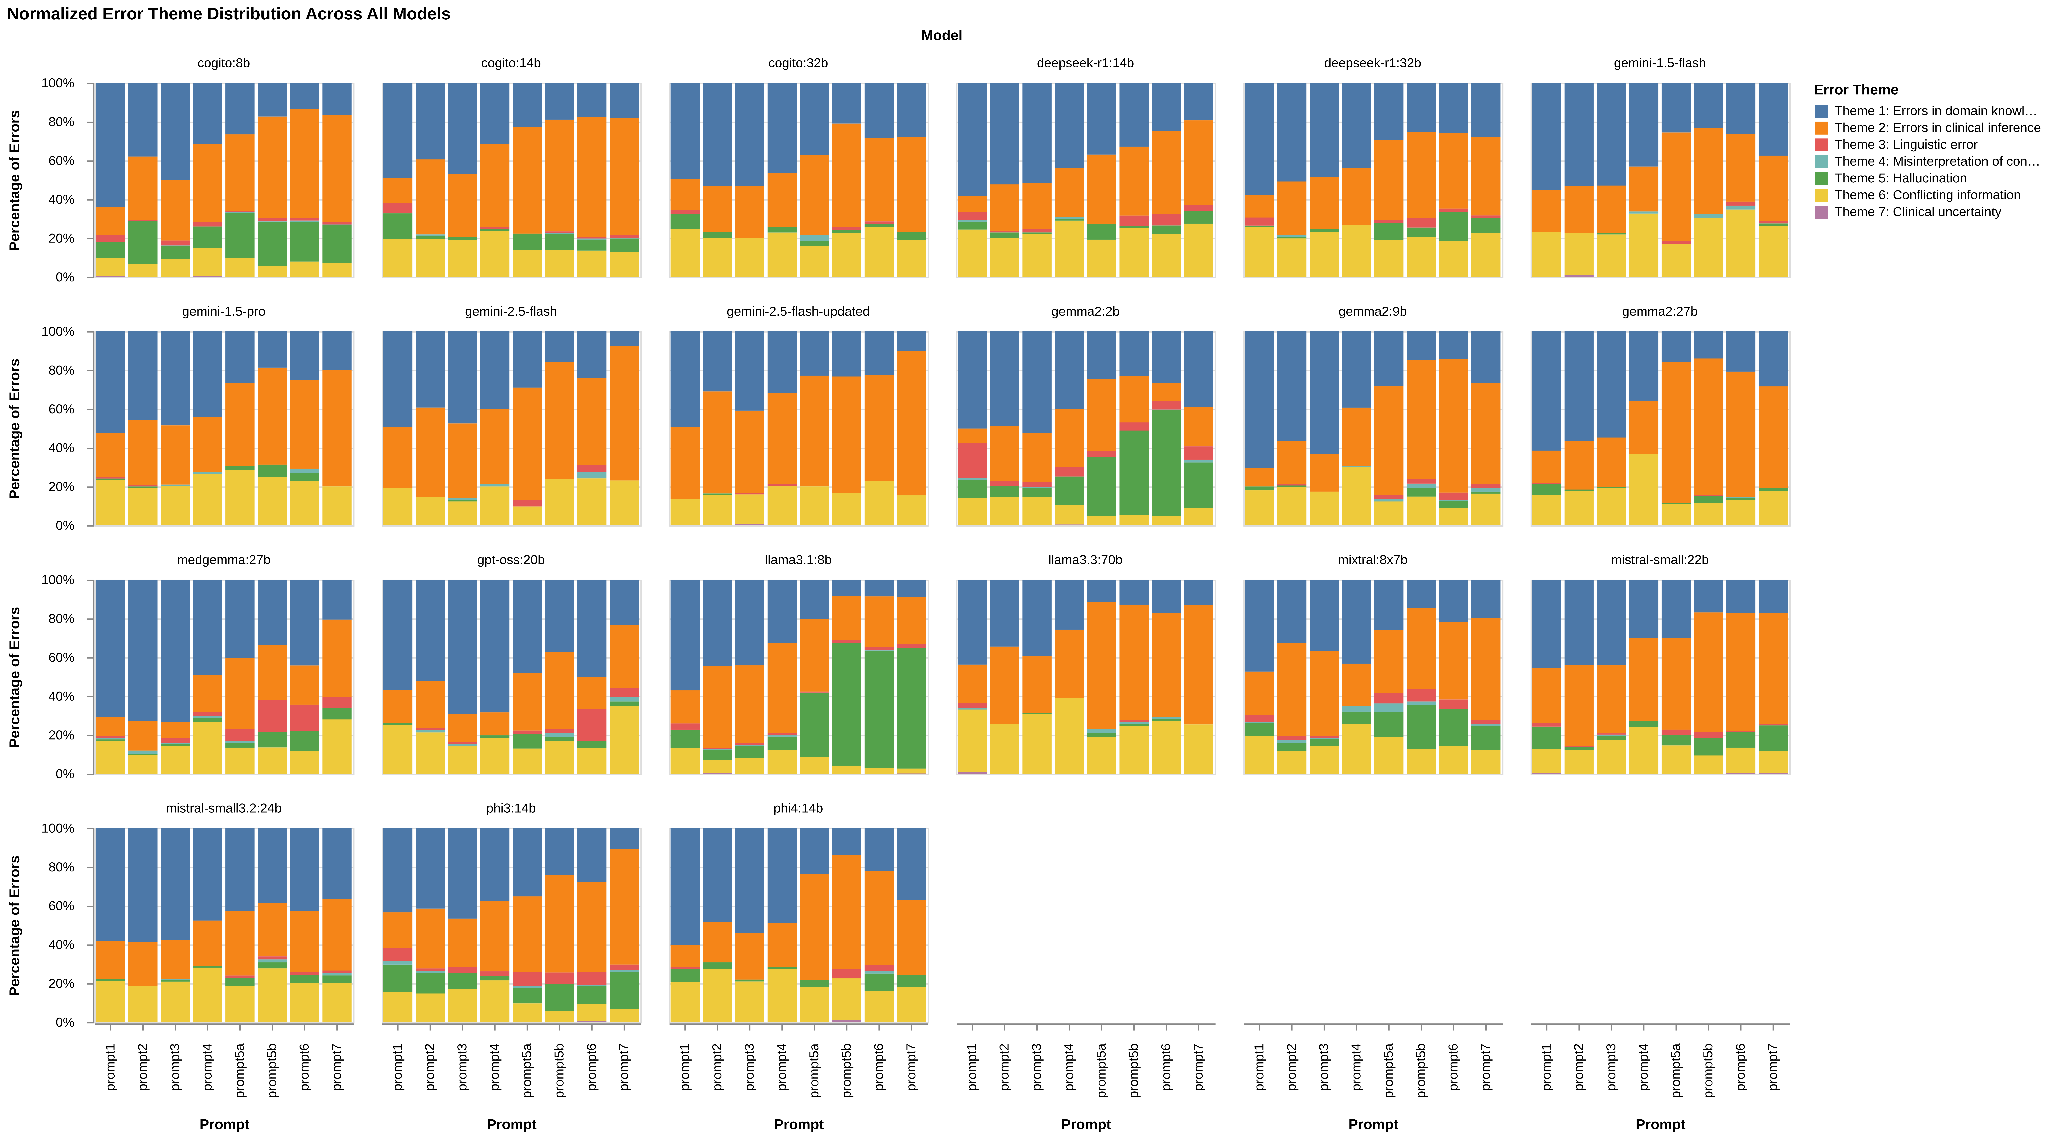

Supplement: Supplementary file 1 [file 362d31fbbe01b18aa7294023.docx]
